# Supplementary material for: Metabolomic Profiling and Antioxidant Activities of Breonadia salicina Using 1H-NMR and UPLC-QTOF-MS Analysis
Source: MDPI journal article supplement (doi:10.3390/molecules26216707), 2021-11-05
Supplement: s1 [file s1]

# Metabolomic Profiling and Antioxidant Activities of *Breonadia Salicina* Using <sup>1</sup>H-NMR and UPLC-QTOF-MS Analysis

\* Correspondence: [Isaiah.Ramaite@univen.ac.za](mailto:Isaiah.Ramaite@univen.ac.za); Tel.: +27(0)15-962-8262

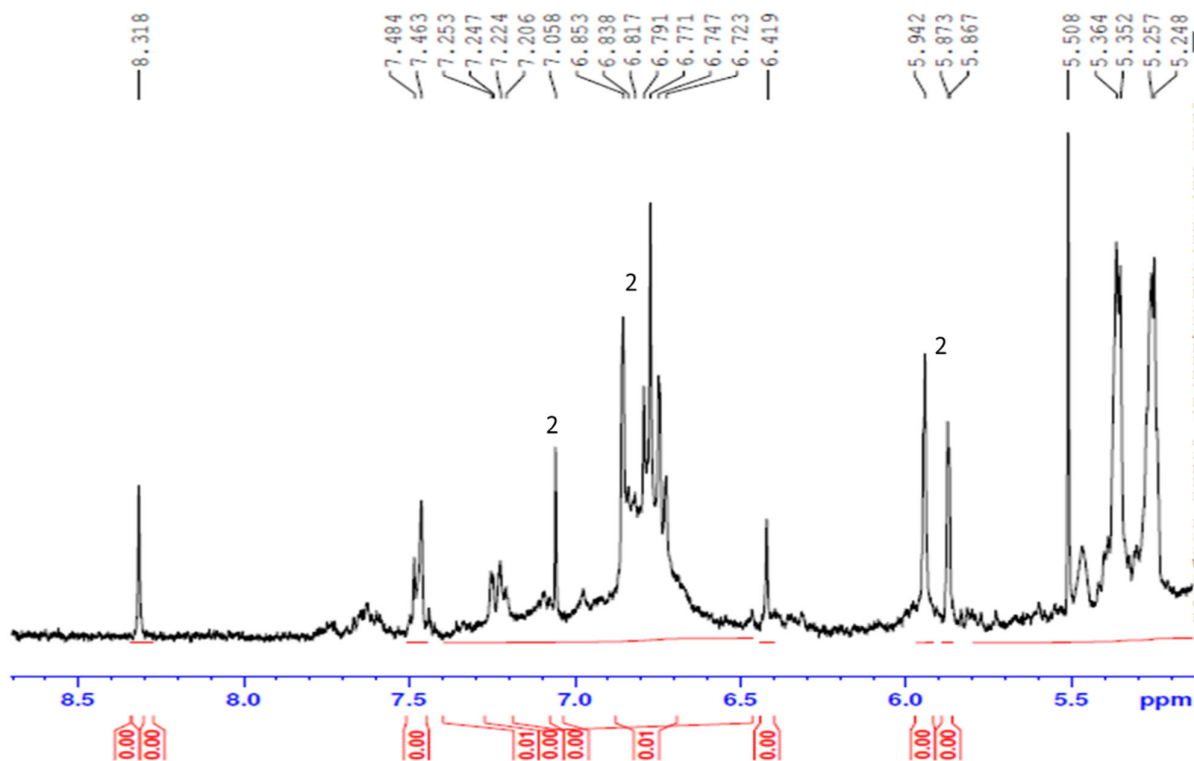

**Figure S1A.** The representative  $^1\text{H}$ -NMR spectra of fraction S1. 1, catechin.

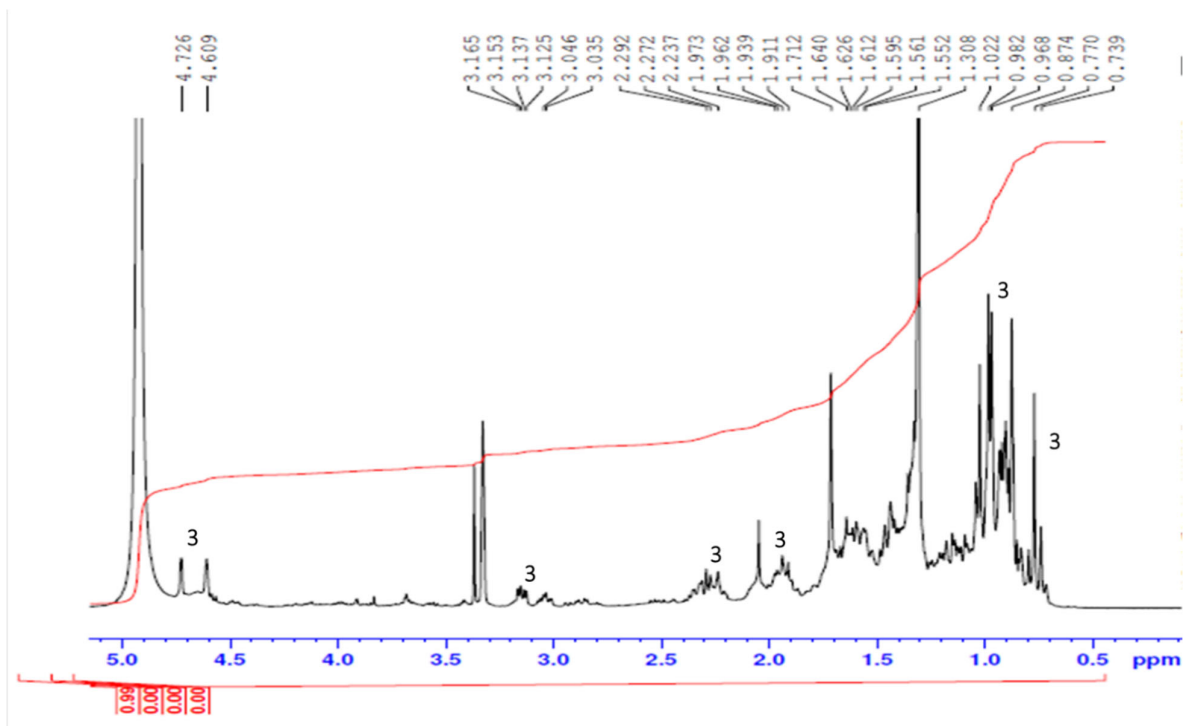

**Figure S1B.** The representative  $^1\text{H}$ -NMR spectra of fraction Si. 3, lupeol.

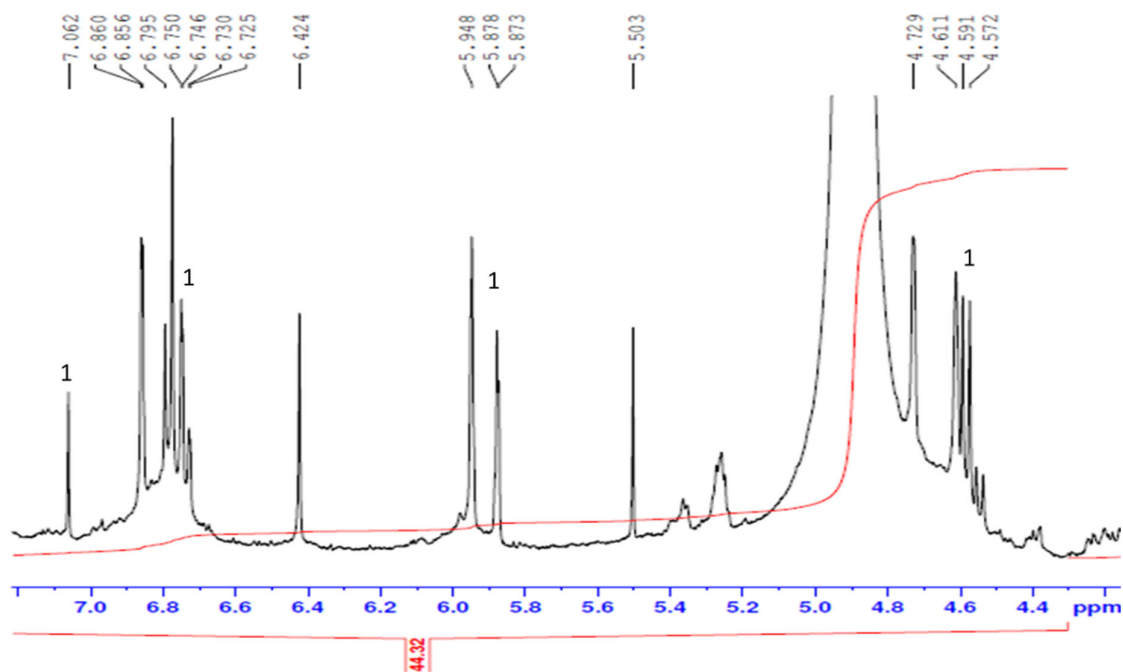

**Figure S2.** The representative  $^1\text{H}$ -NMR spectra of fraction S2. 1, catechin.

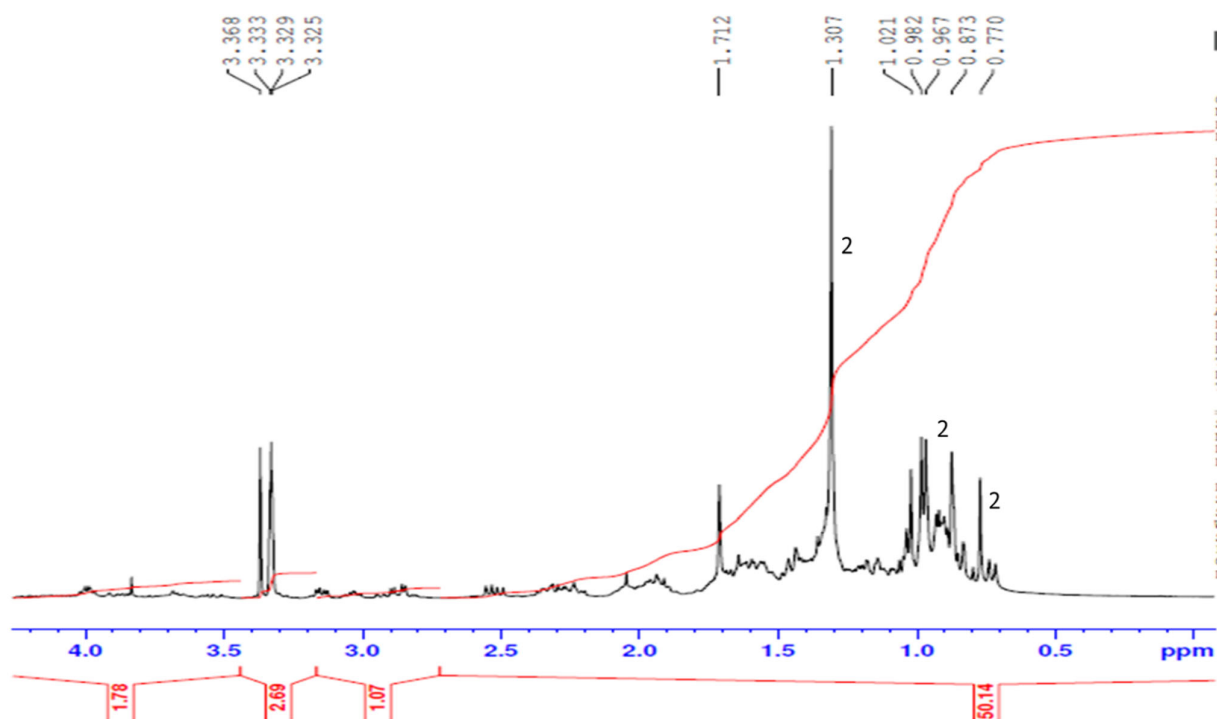

**Figure S3.** The representative  $^1\text{H}$ -NMR spectra of fraction S<sub>2</sub>, 2, lupeol.

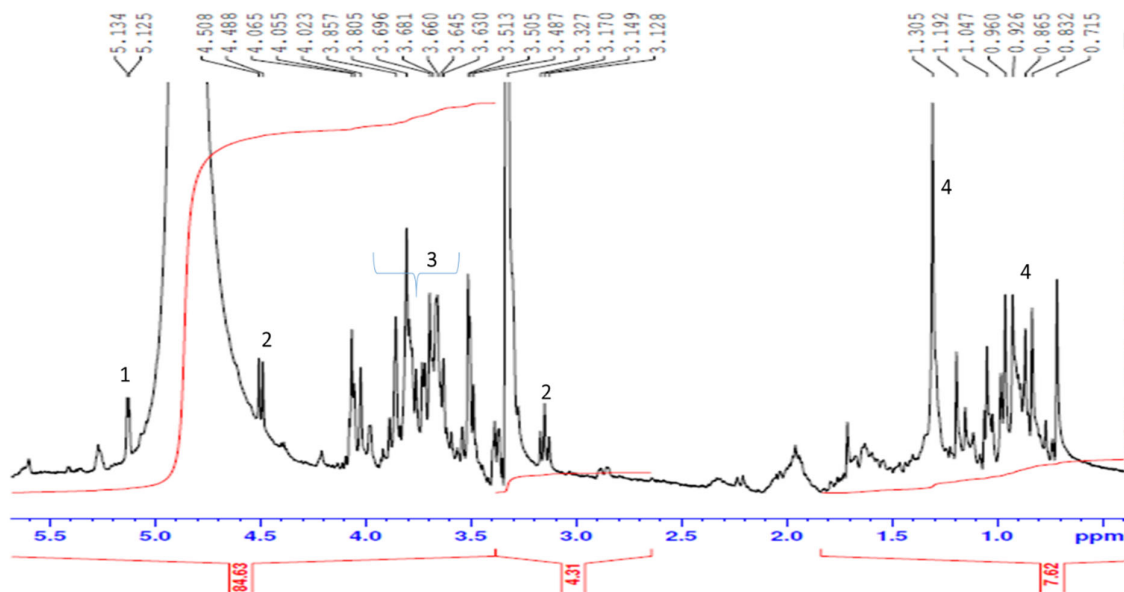

**Figure S4.** The representative  $^1\text{H}$ -NMR spectra of R.crude. 1,  $\alpha$ -glucose; 2,  $\beta$ -glucose; 3, glucose and fructose; 4, lupeol.

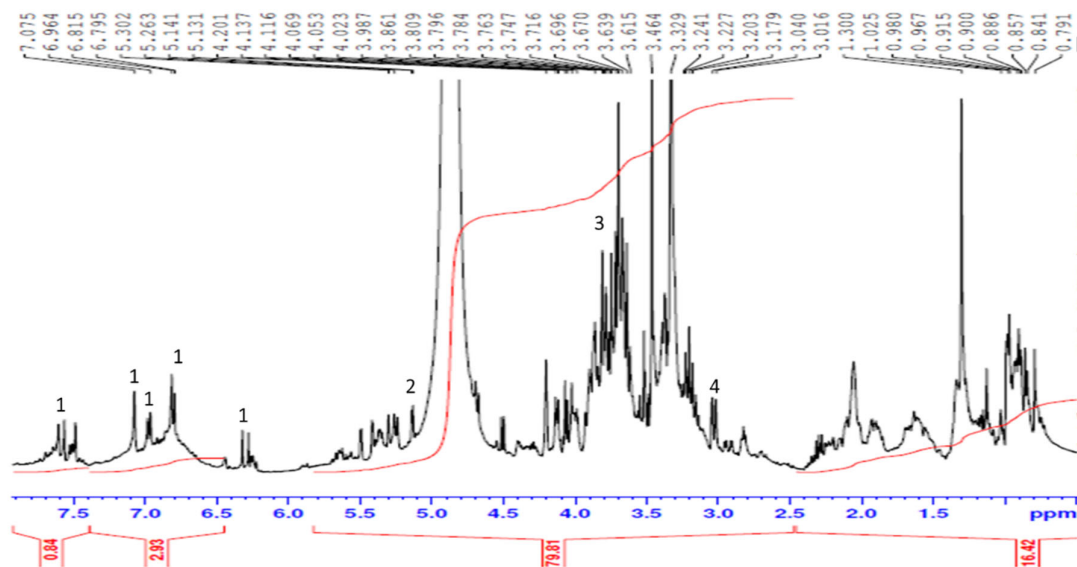

**Figure S5.** The representative  $^1\text{H}$ -NMR spectra of LM.crude. 1, 5-*O*-caffeoylquinic acid; 2,  $\alpha$ -glucose; 3, glucose and fructose; 4,  $\beta$ -glucose.

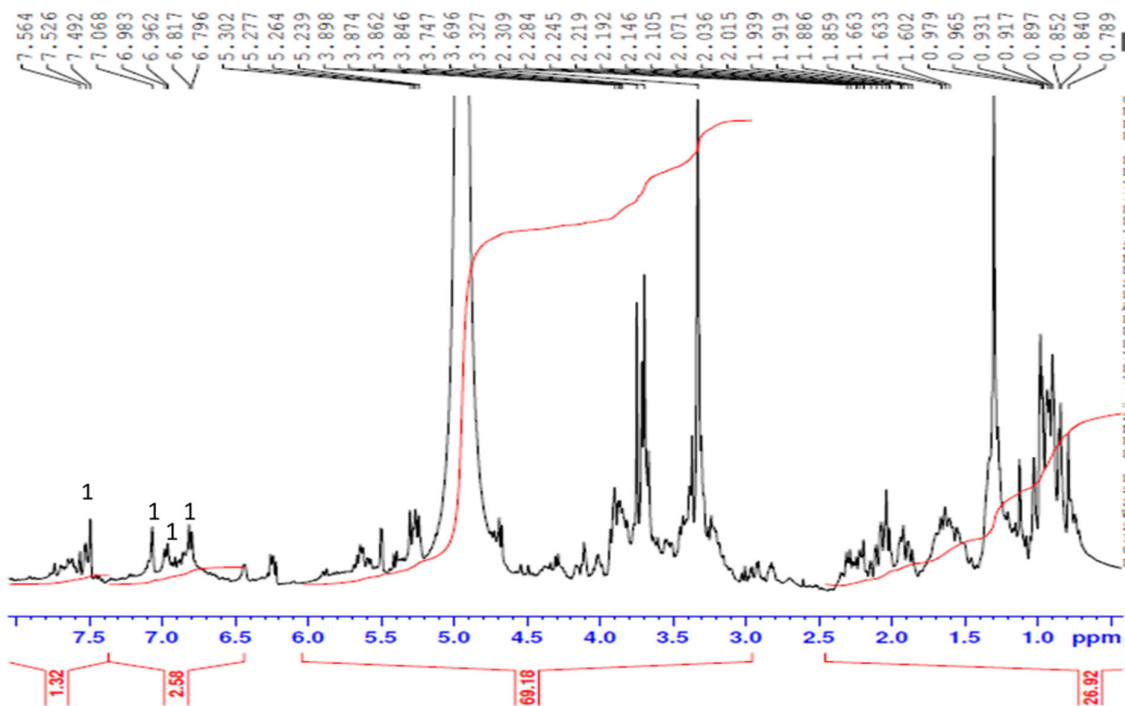

**Figure S6.** The representative  $^1\text{H}$ -NMR spectra of fraction LM2. 1, 5-*O*-caffeoylquinic acid.



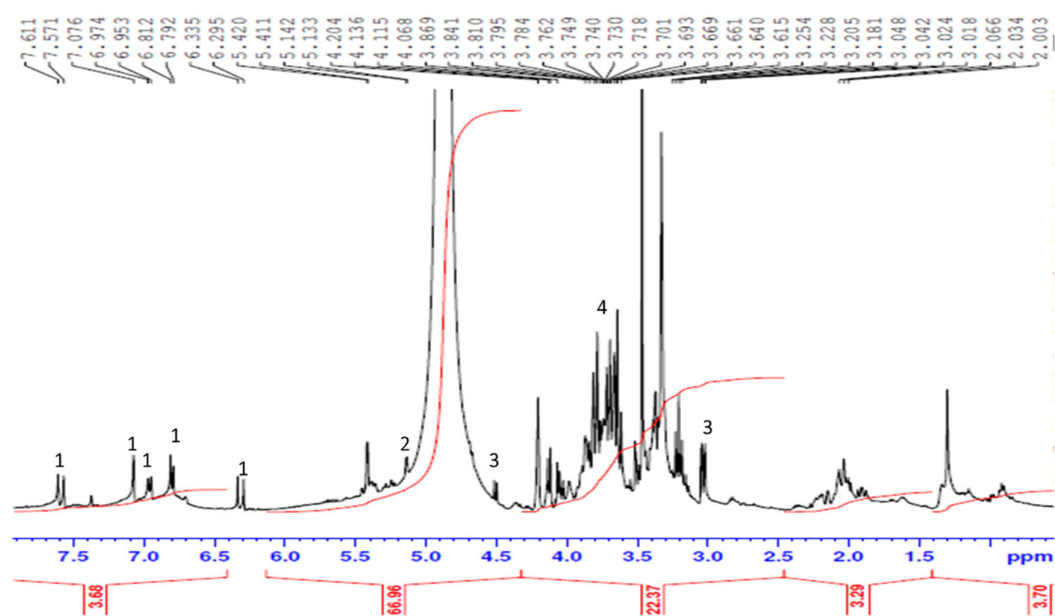

**Figure S7.** The representative <sup>1</sup>H-NMR spectra of fraction LM<sub>3</sub>. 1, 5-O-caffeoylquinic acid; 2, α-glucose; 3, β-glucose; 4, glucose and fructose.

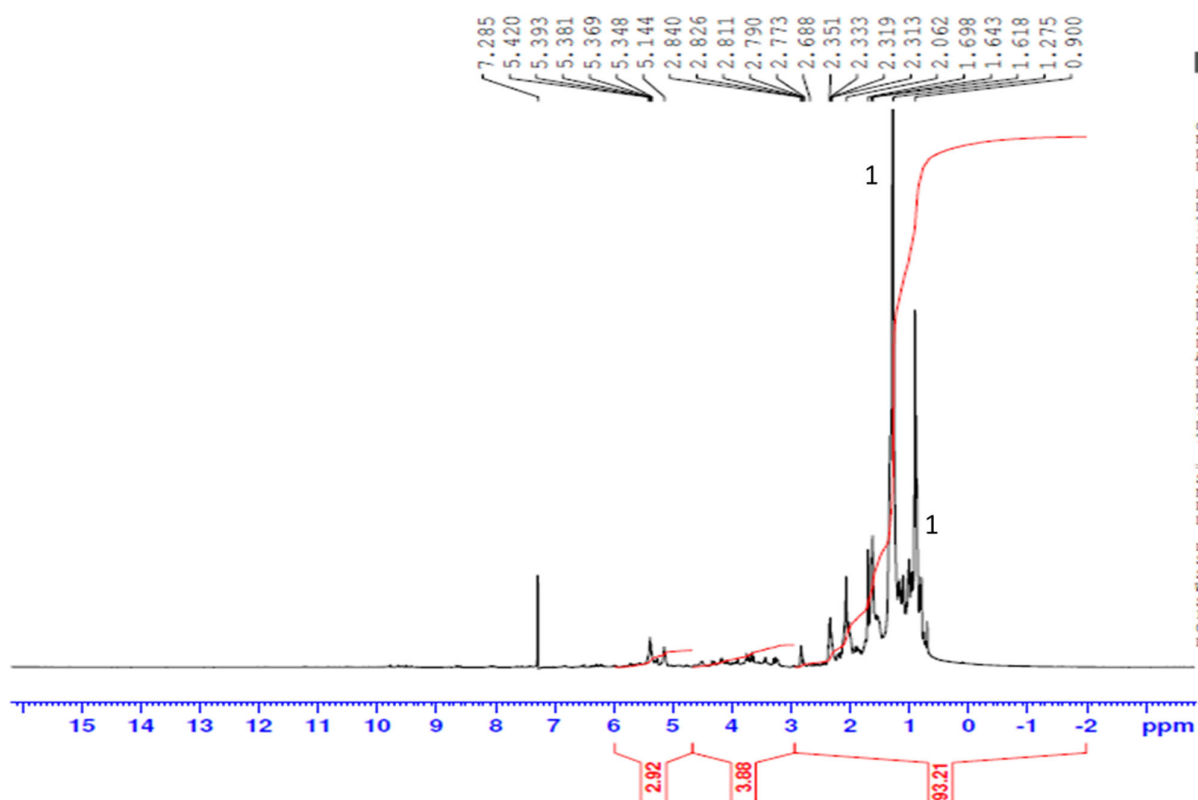

**Figure S8.** The representative <sup>1</sup>H-NMR spectra of LD.crude. 1, hexadecane.

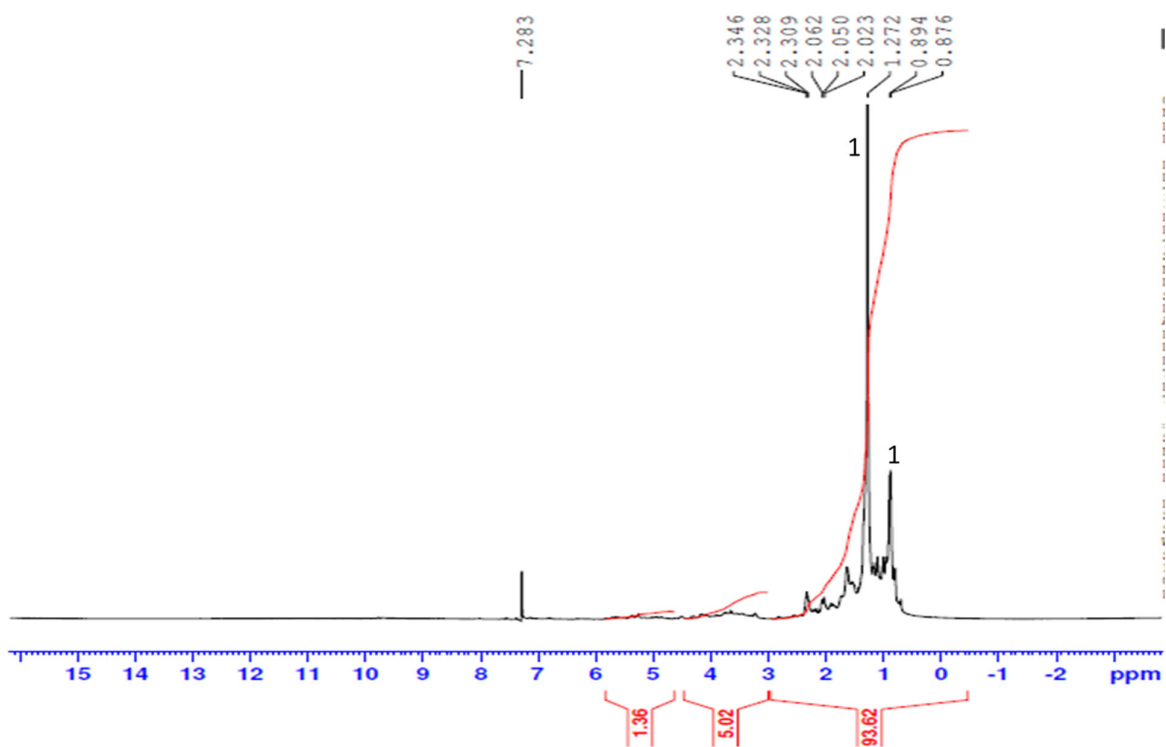

Figure S9. The representative  $^1\text{H}$ -NMR spectra of fraction R1. 1, hexadecane.

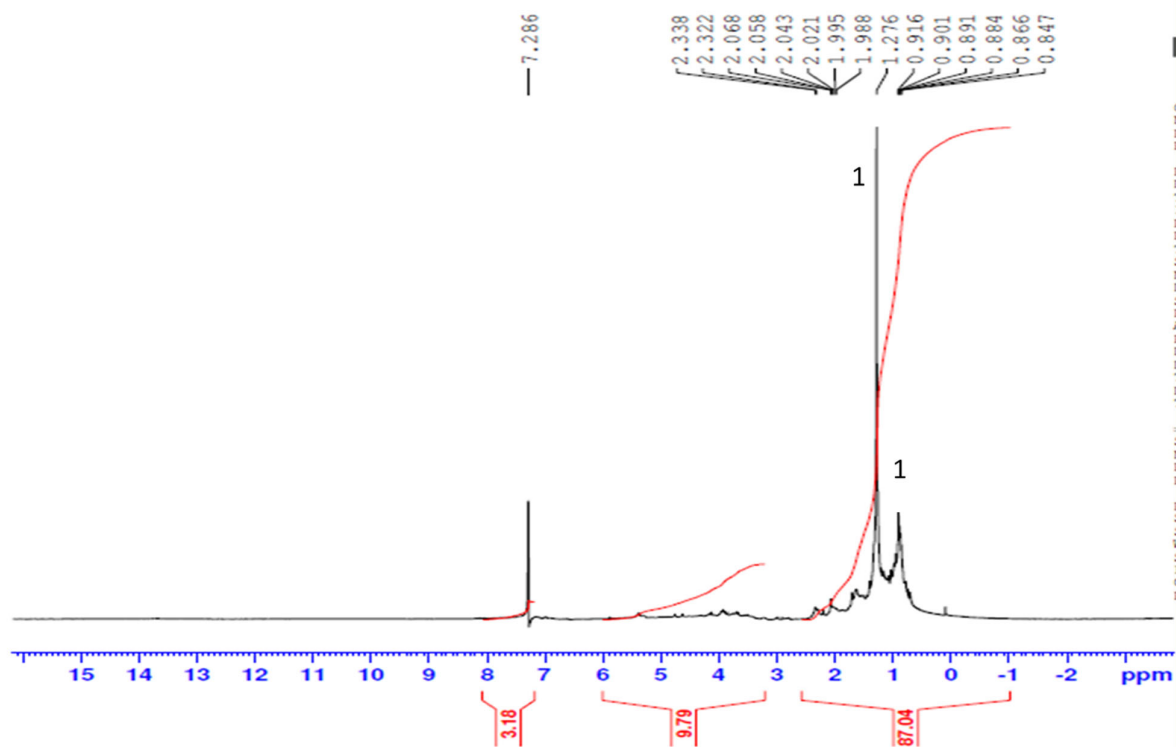

Figure S10. The representative  $^1\text{H}$ -NMR spectra of fraction LD3. 1, hexadecane.

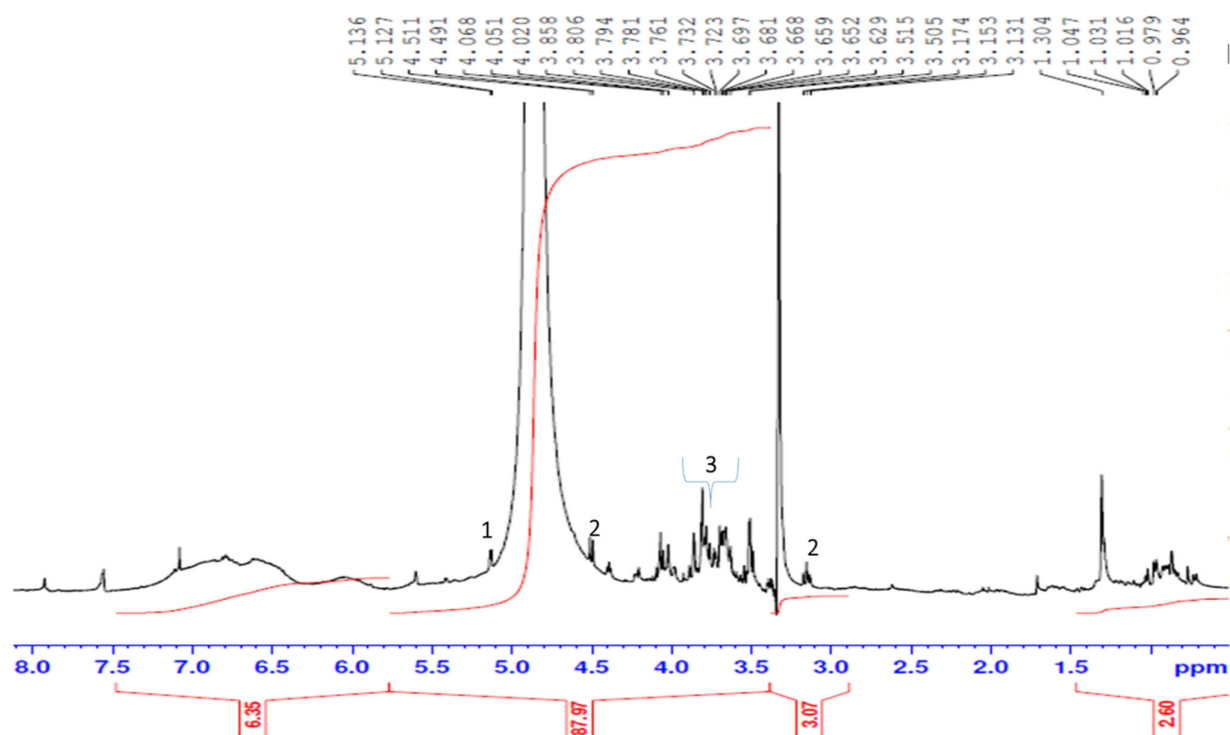

**Figure S11.** The representative  $^1\text{H}$ -NMR spectra of S.crude. 1,  $\alpha$ -glucose; 2,  $\beta$ -glucose; 3, glucose and fructose.

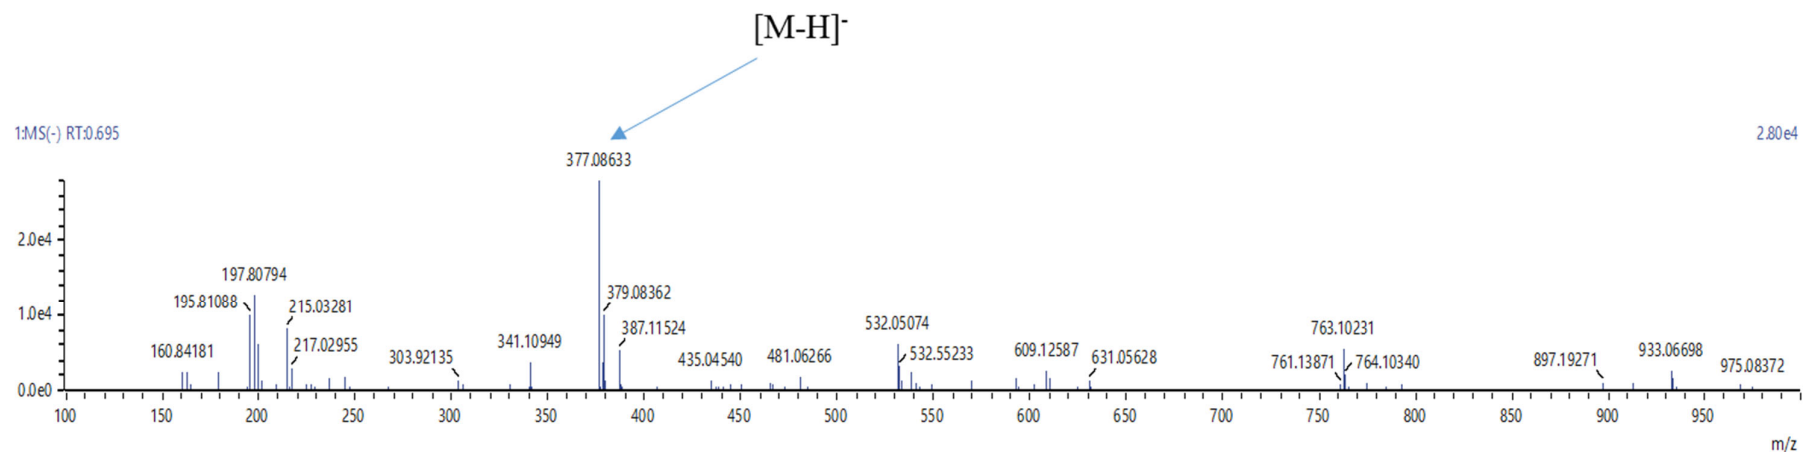

**Figure S12.** Molecular ion of caffeic acid derivative.

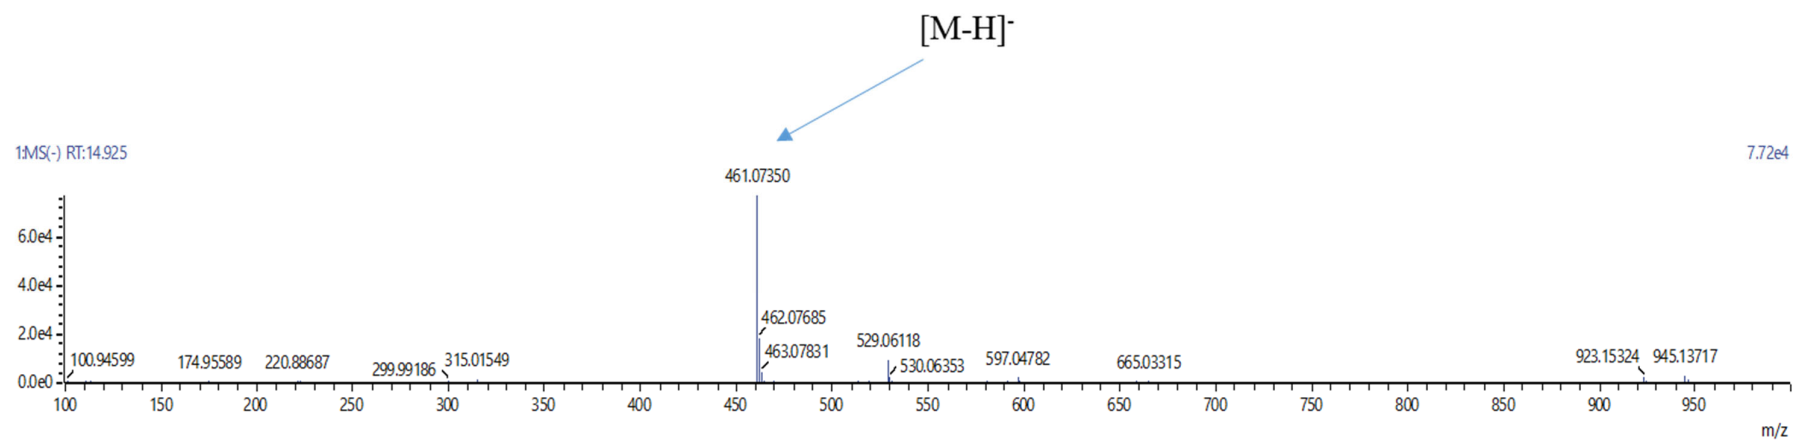

**Figure S13.** Molecular ion of 4'-O-methyellagic acid-3-O- $\alpha$ -L-rhamnopyranoside.

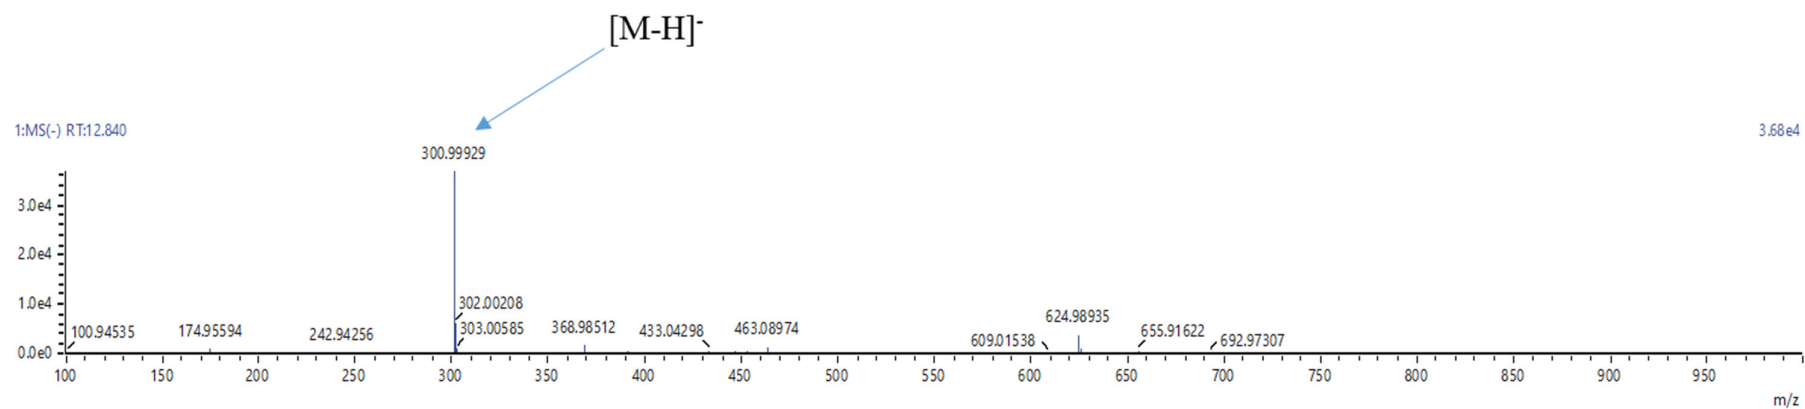

Figure S14. Molecular ion of ellagic acid.

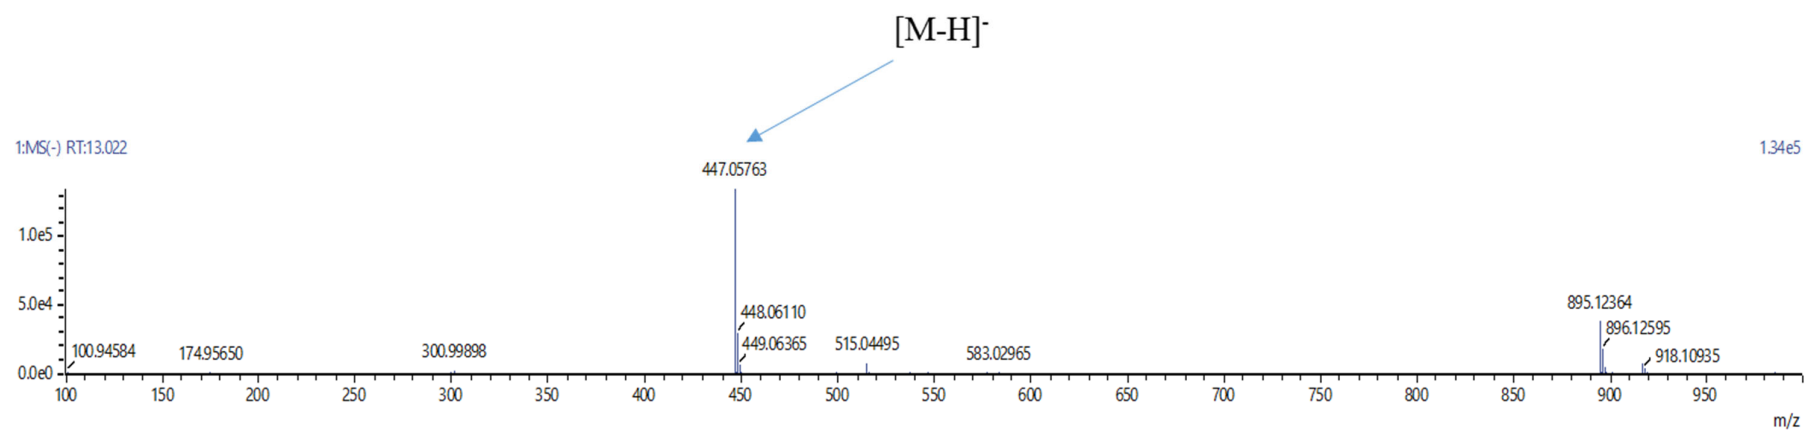

Figure S15. Molecular ion of ellagic acid-rhamnopyranoside isomer I.

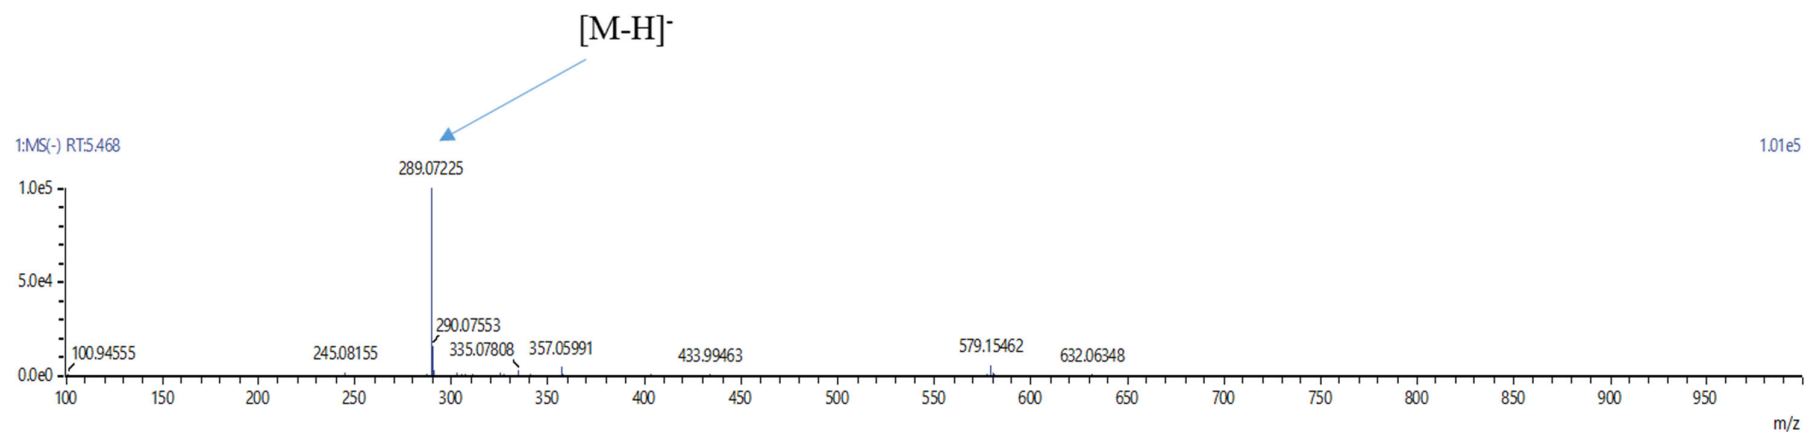

**Figure S16.** Molecular ion of catechin.

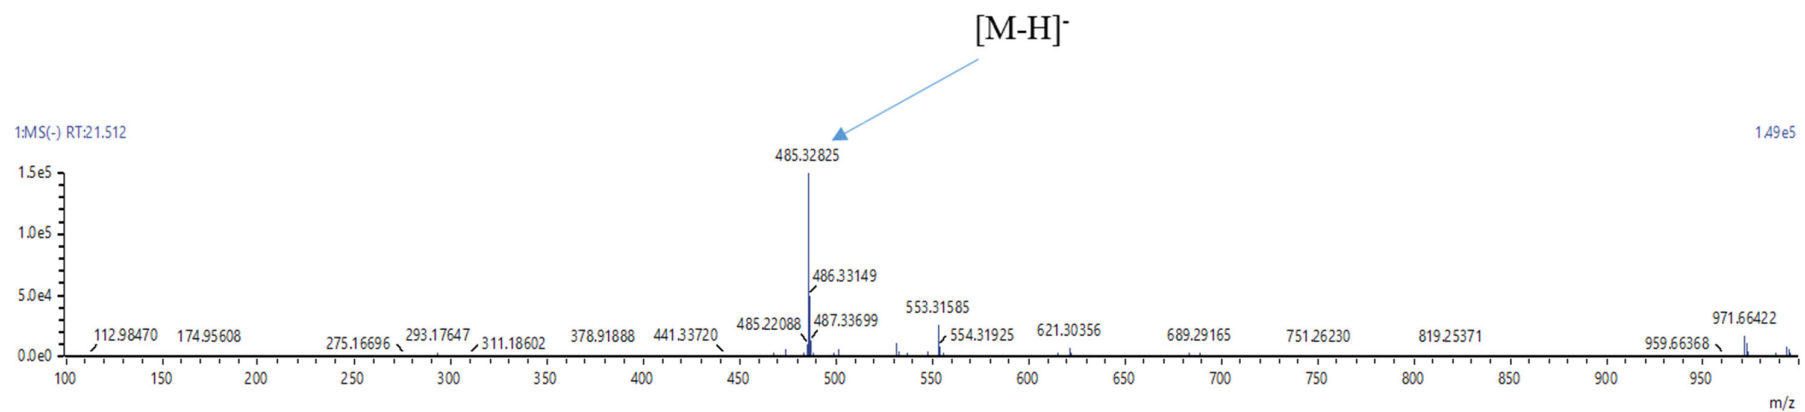

**Figure S17.** Molecular ion of hydroxyglycyrrhetic acid.

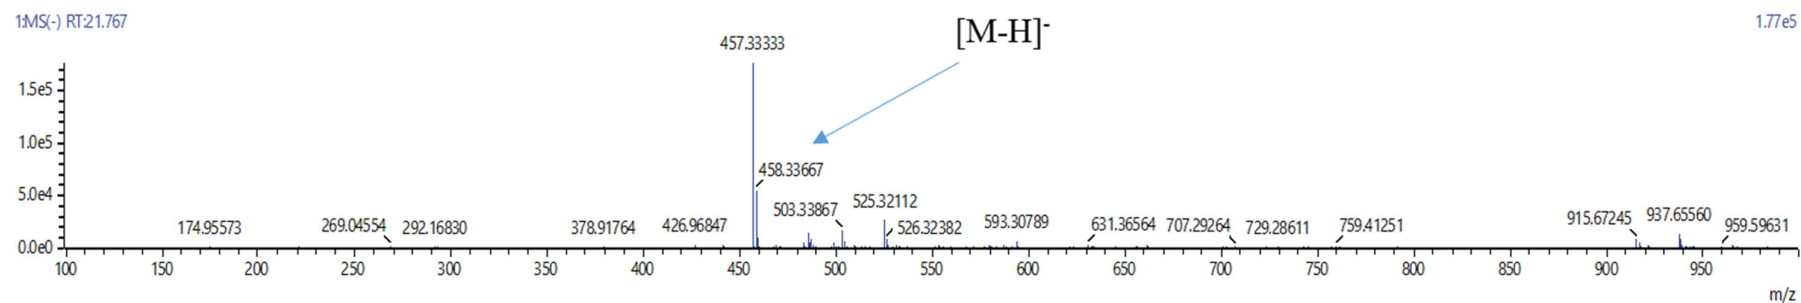

**Figure S18.** Molecular ion of neotigogenin acetate.

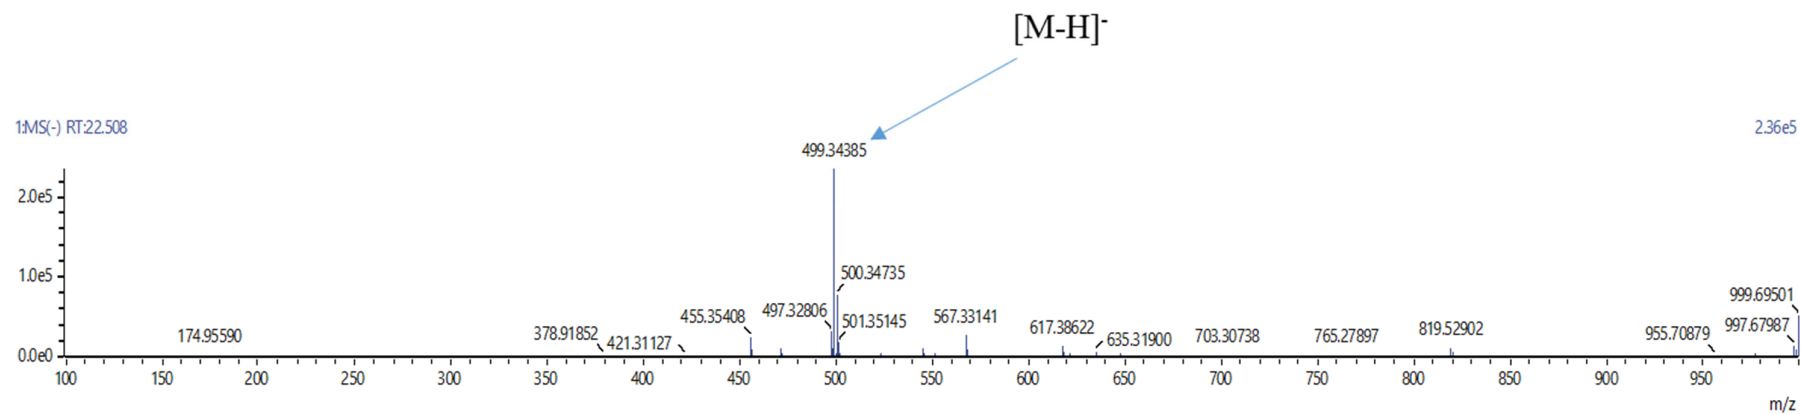

**Figure S19.** Molecular ion of 25-hydroxy-3-epi-dehydrotumulosic acid.

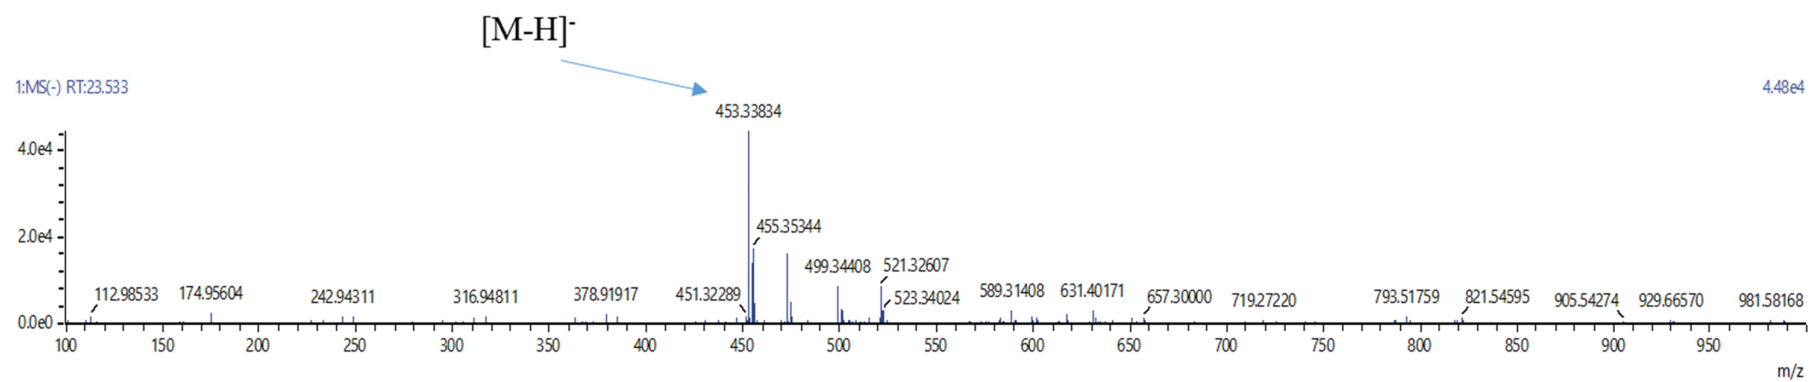

**Figure S20.** Molecular ion of micromeric acid.

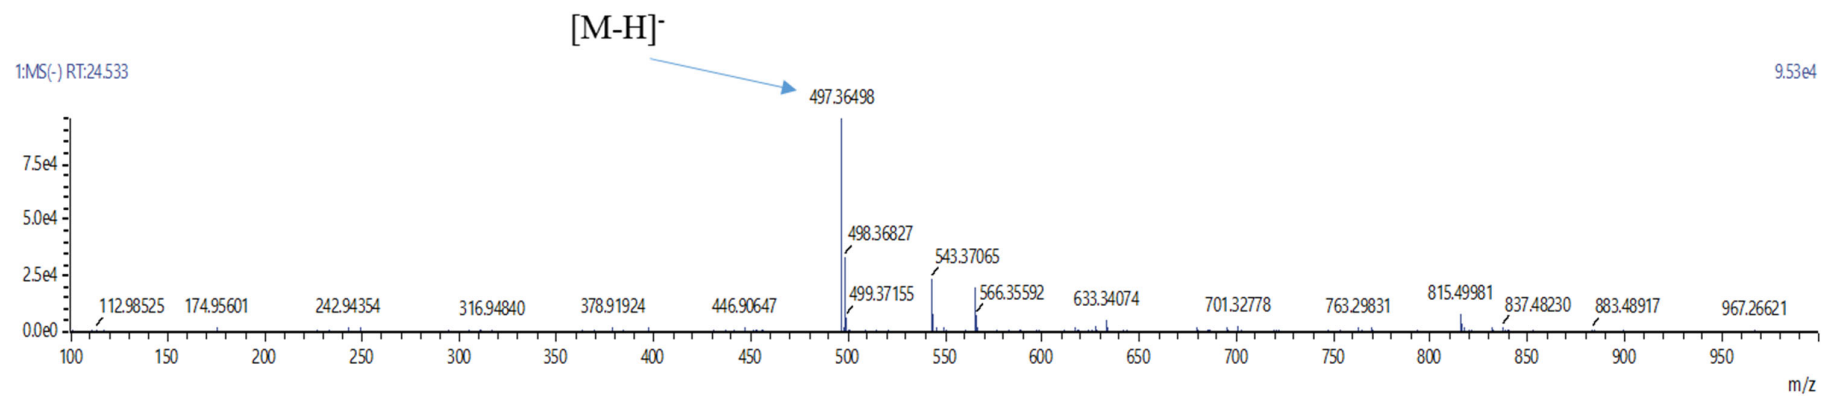

**Figure S21.** Molecular ion of 3-acetylursolic acid.



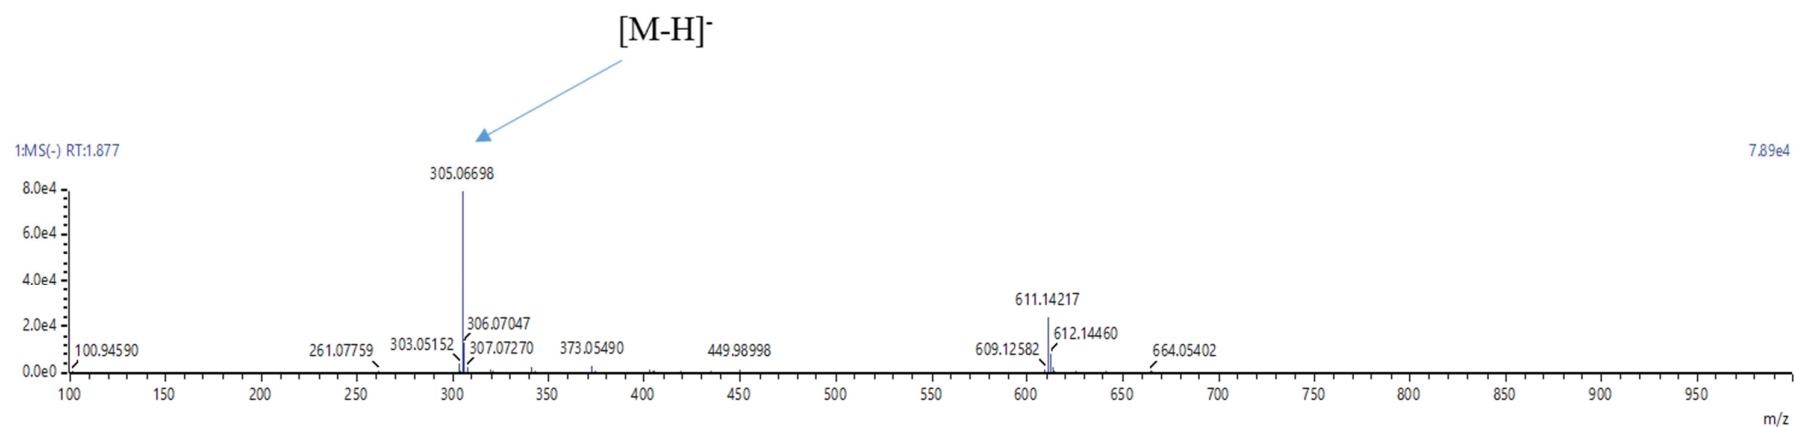

**Figure S22.** Molecular ion of (epi) gallocatechin.

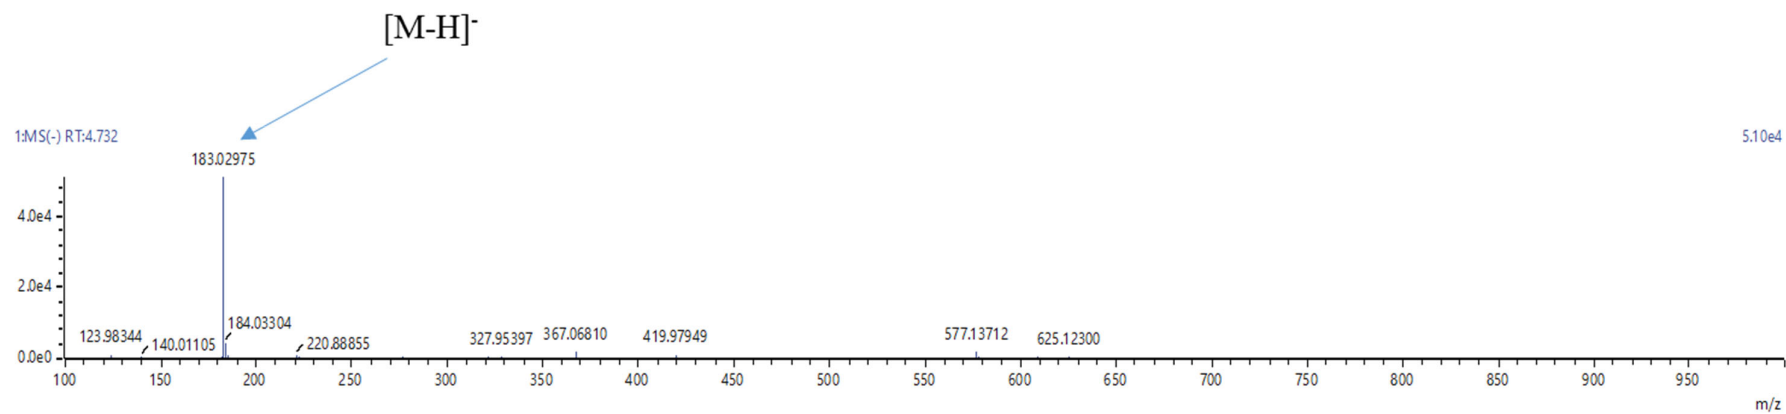

**Figure S23.** Molecular ion of 4-O-methylgallic acid.

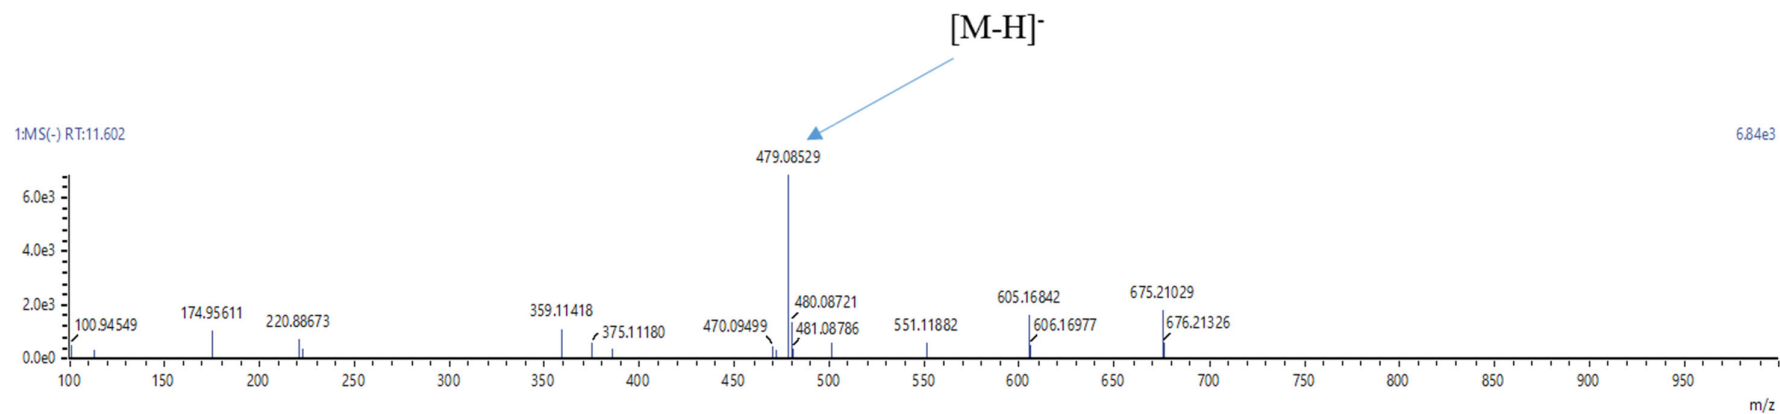

**Figure S24.** Molecular ion of myricetin 3-*O*-glucoside.

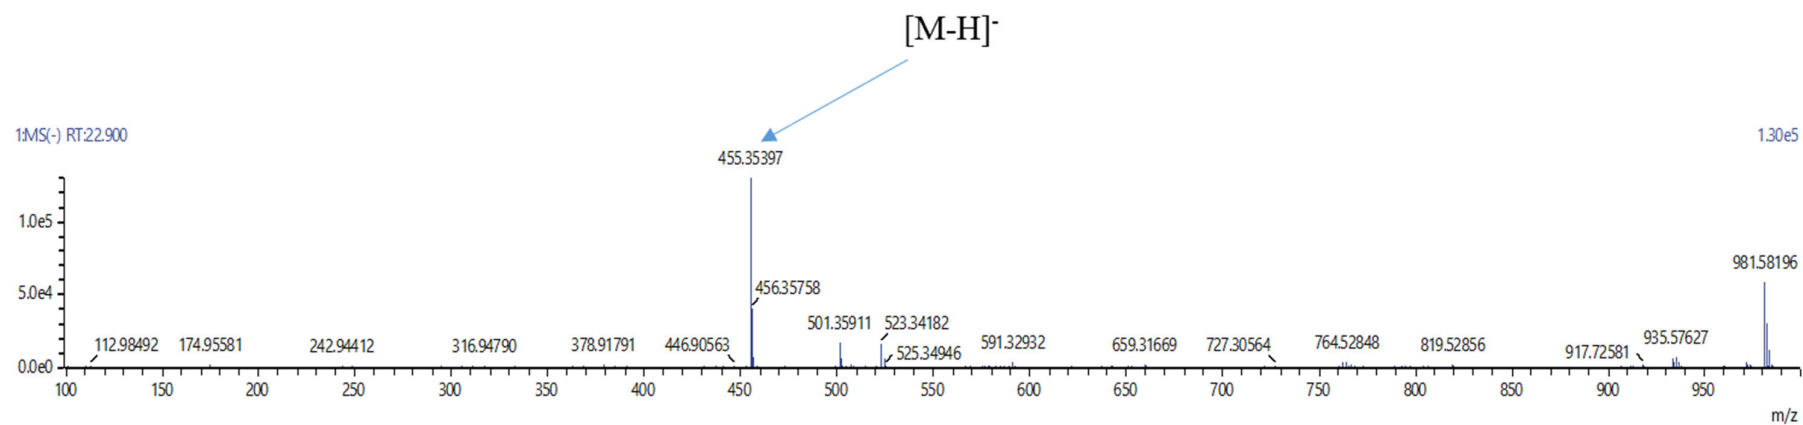

**Figure S25.** Molecular ion of ursolic acid.

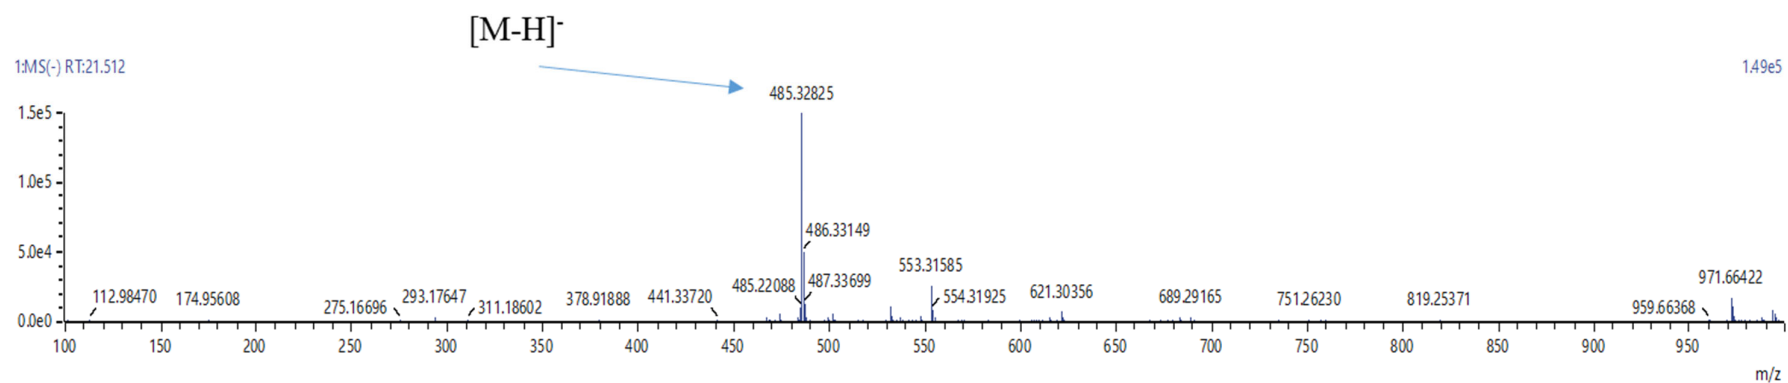

**Figure S26.** Molecular ion of asiatic acid.

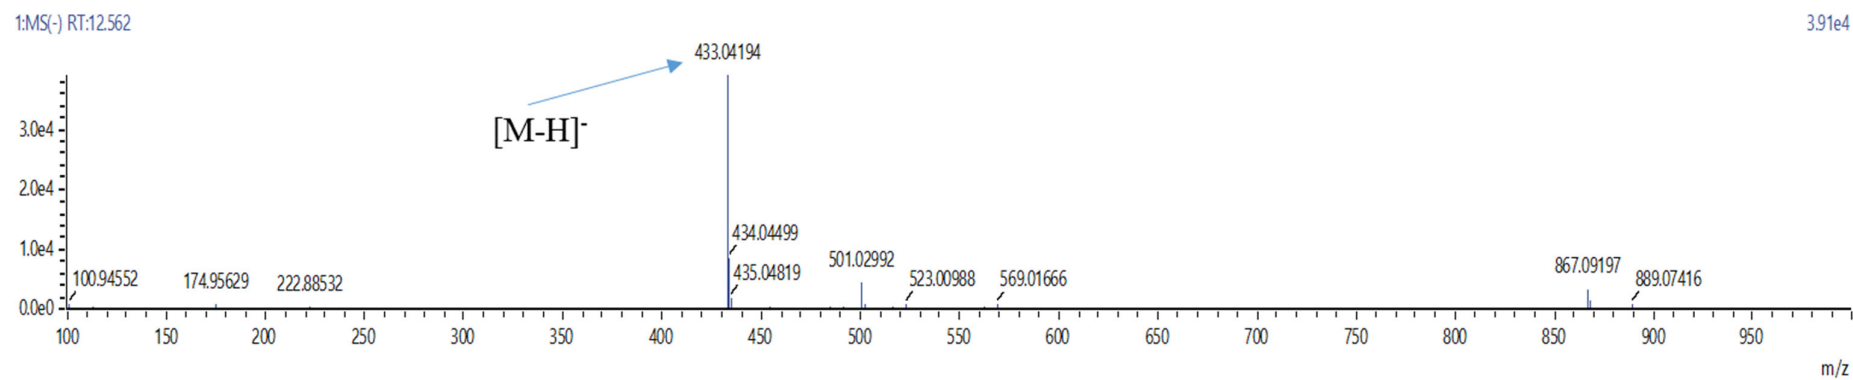

**Figure S27.** Molecular ion of ellagic acid pentoside.

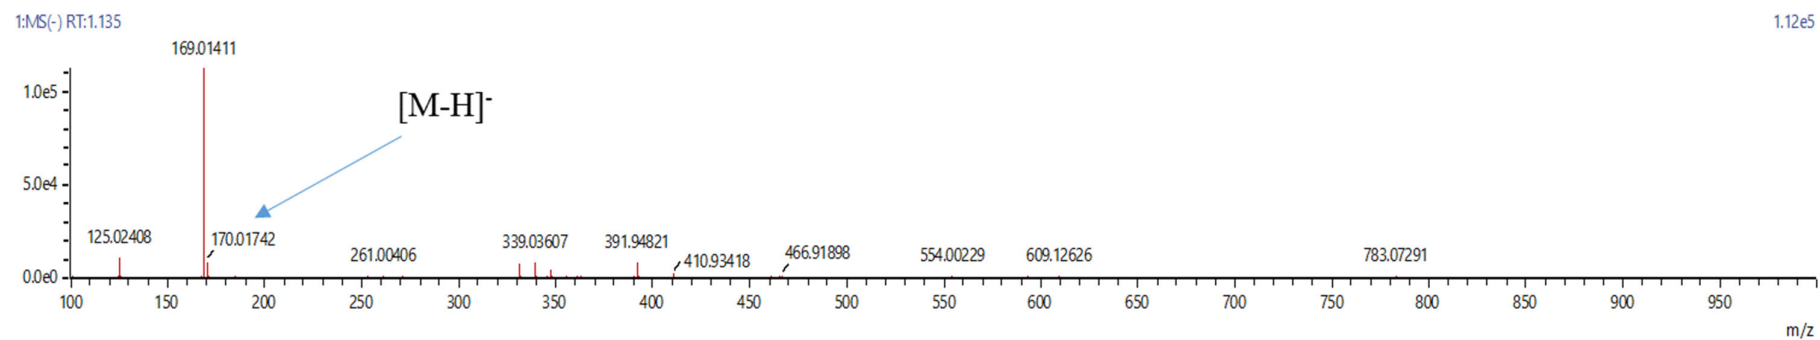

**Figure S28.** Molecular ion of gallic acid.

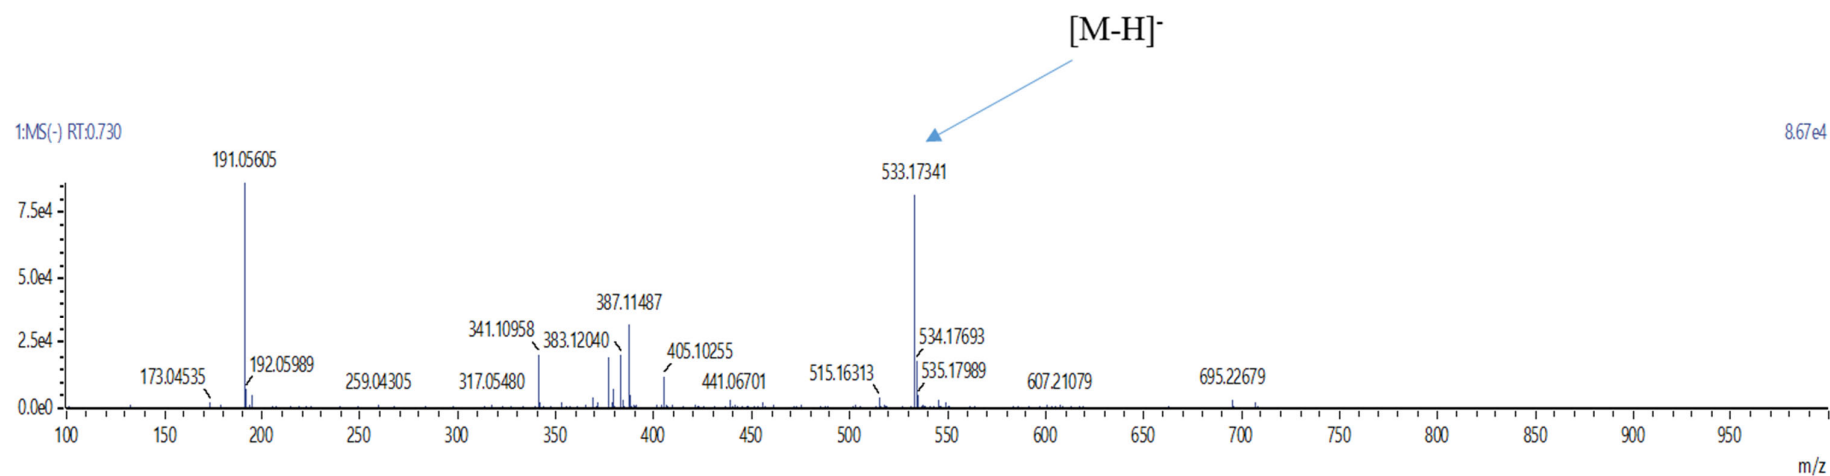

**Figure S29.** Molecular ion of quinic acid + hexose<sub>2</sub>.

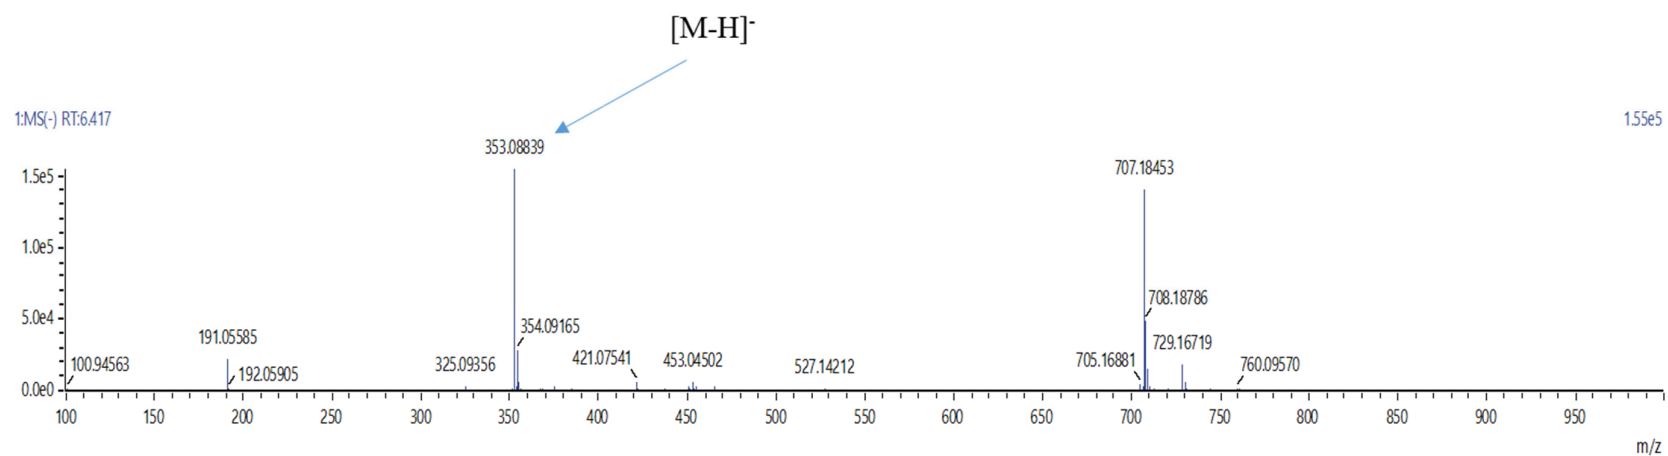

**Figure S30.** Molecular ion of chlorogenic acid [3,4-dihydroxycinnamoylquinic acid; 5-caffeoylquinic acid].

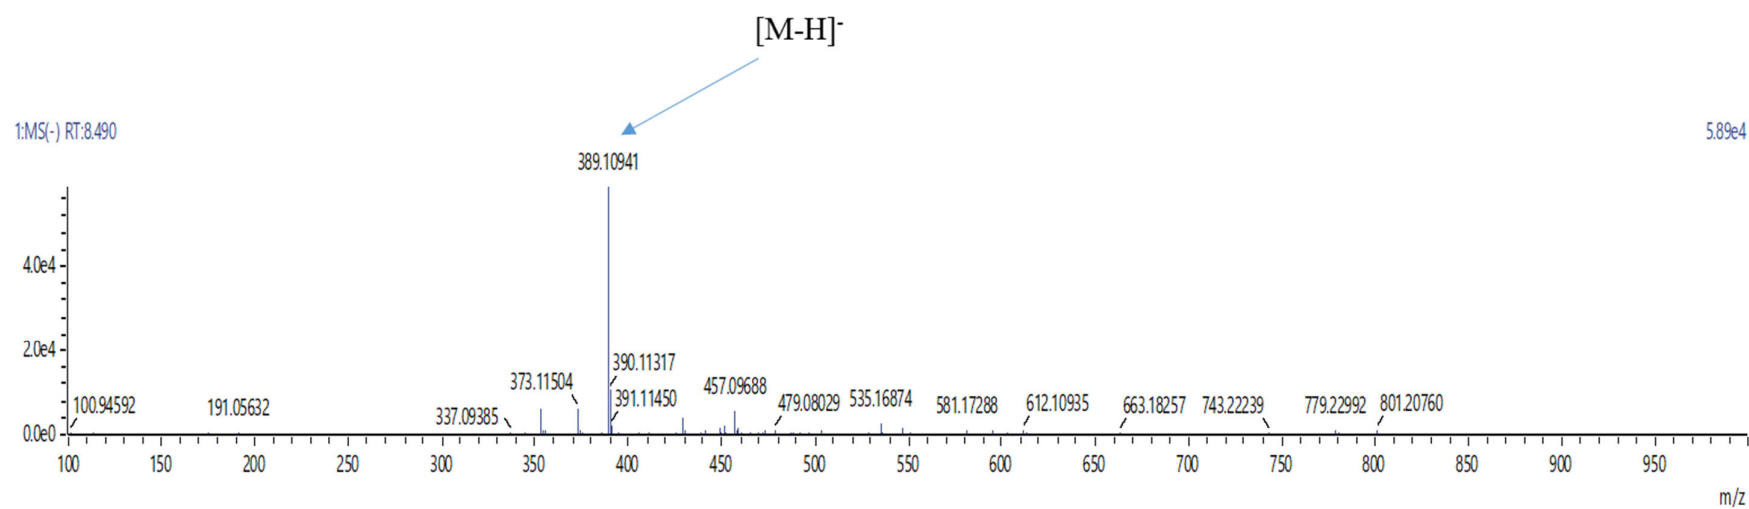

**Figure S31.** Molecular ion of deacetyl asperuloside acid.

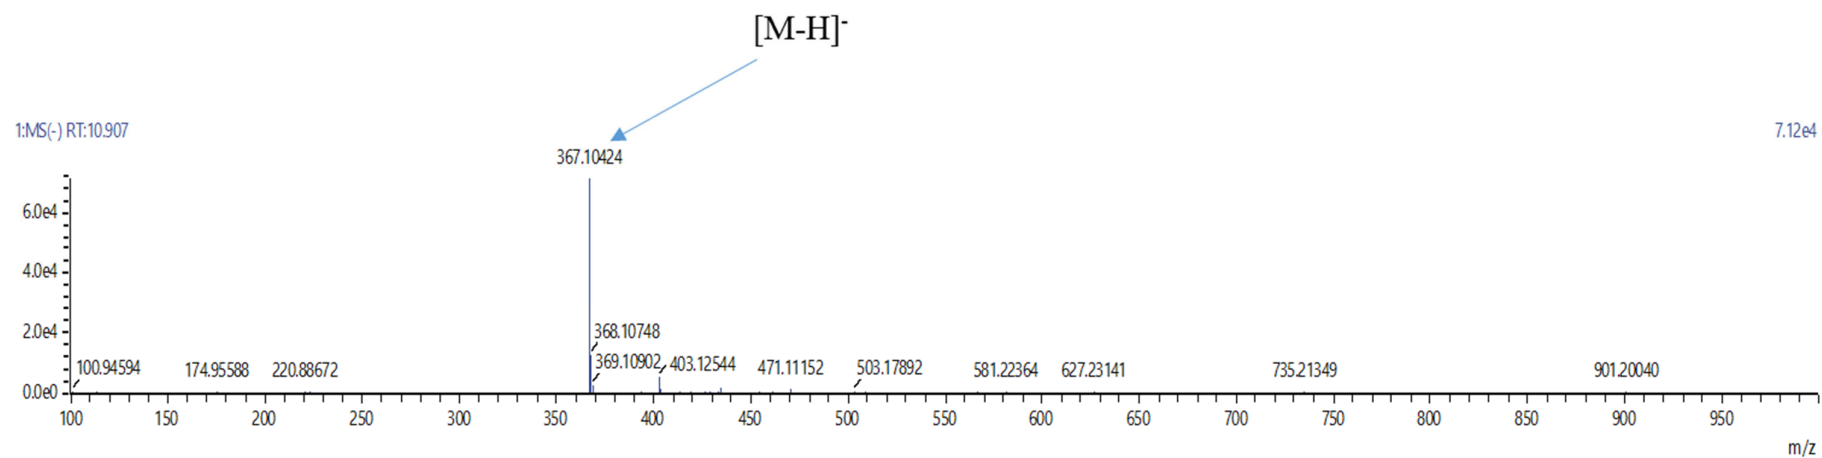

**Figure S32.** Molecular ion of 5-methyl caffeoylquinic acid.

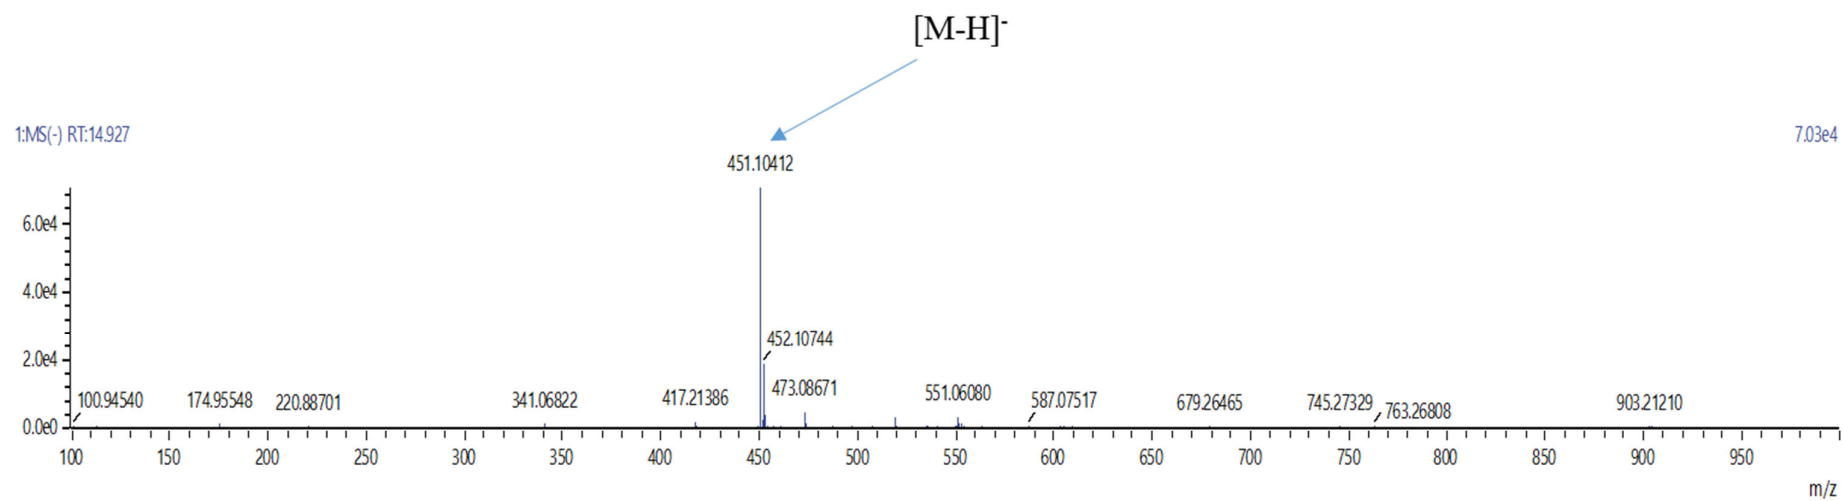

**Figure S33.** Molecular ion of cinchonain I isomer.

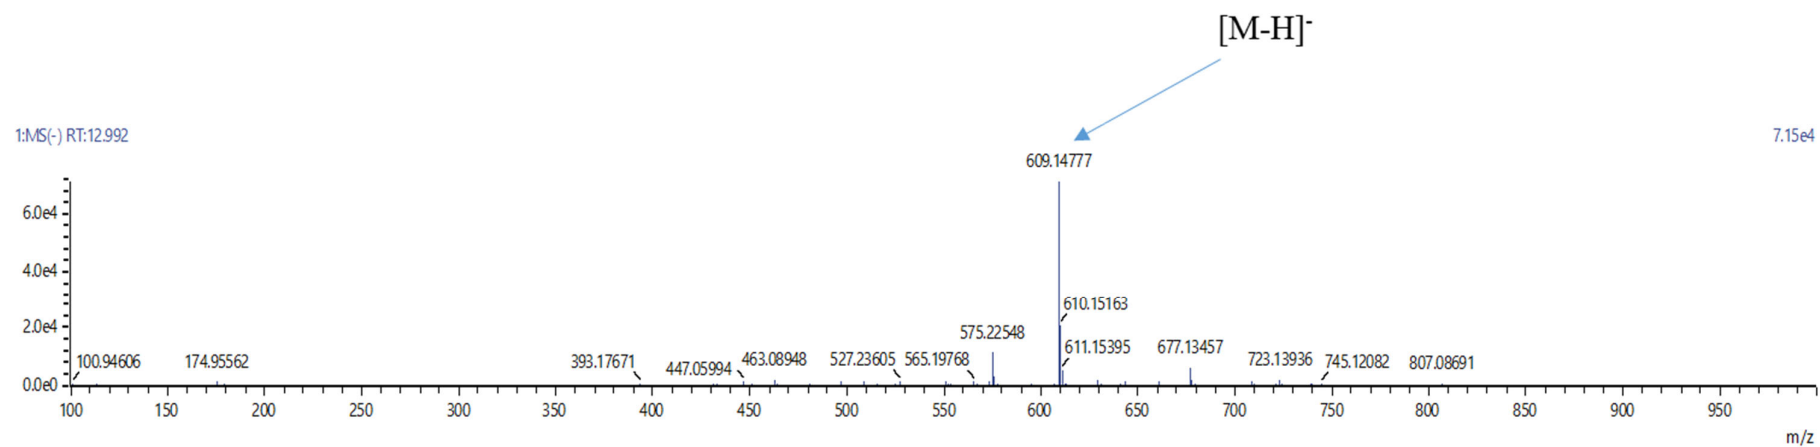

**Figure S34.** Molecular ion of rutin.

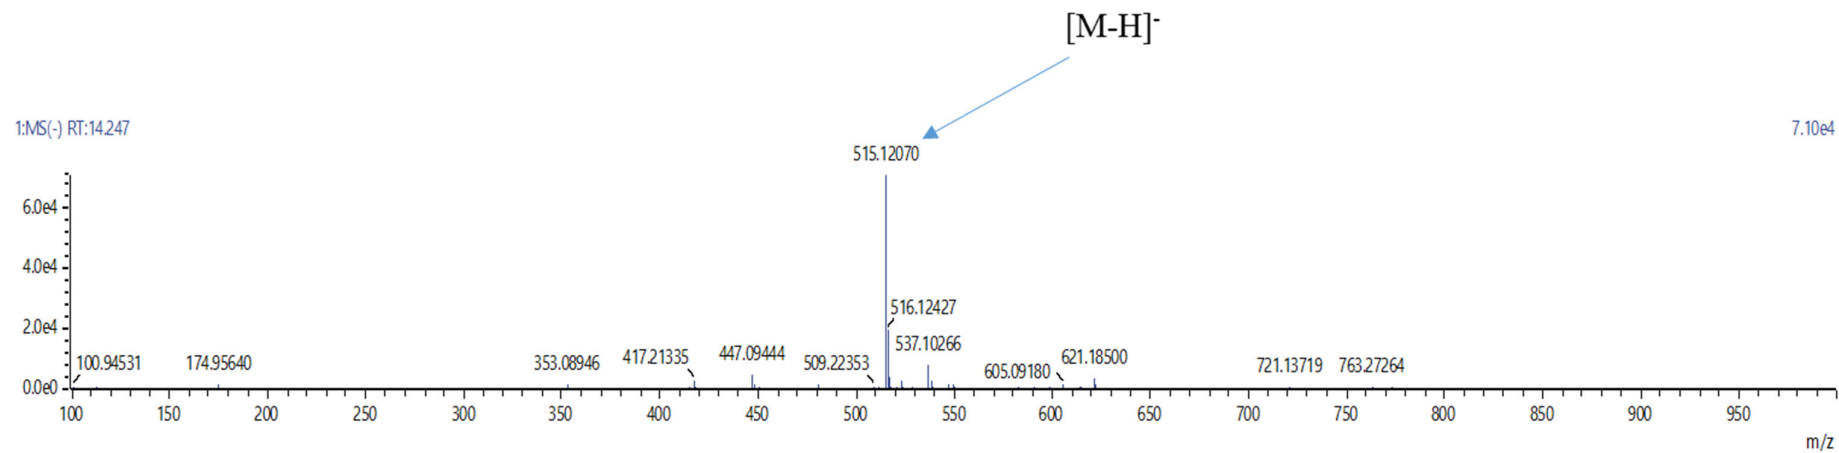

**Figure S35.** Molecular ion of di-*O*-caffeoylquinic acid.

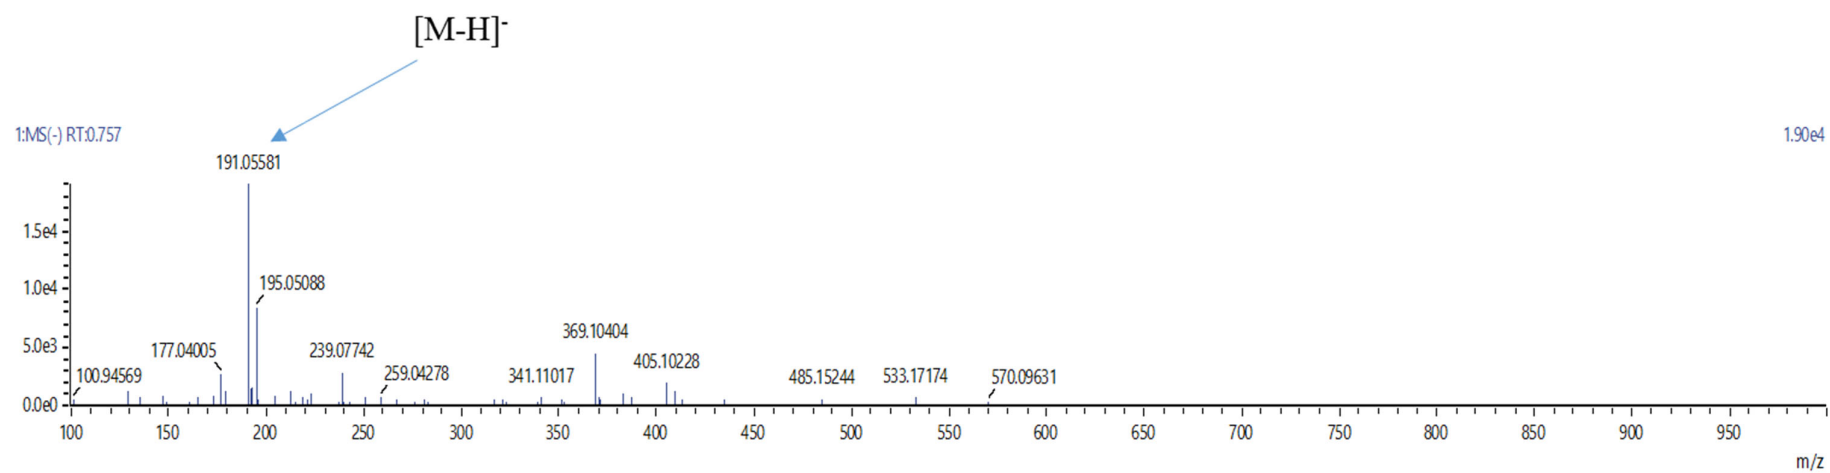

**Figure S36.** Molecular ion of quinic acid.



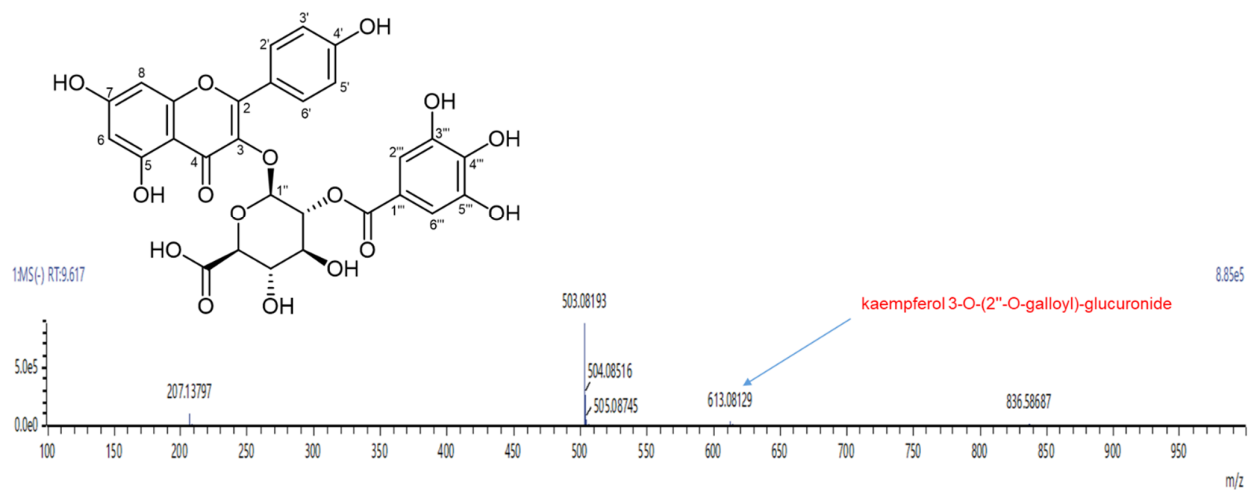

**Figure S37.** Mass spectrum of kaempferol 3-O-(2''-O-galloyl)-glucuronide (1) [1].

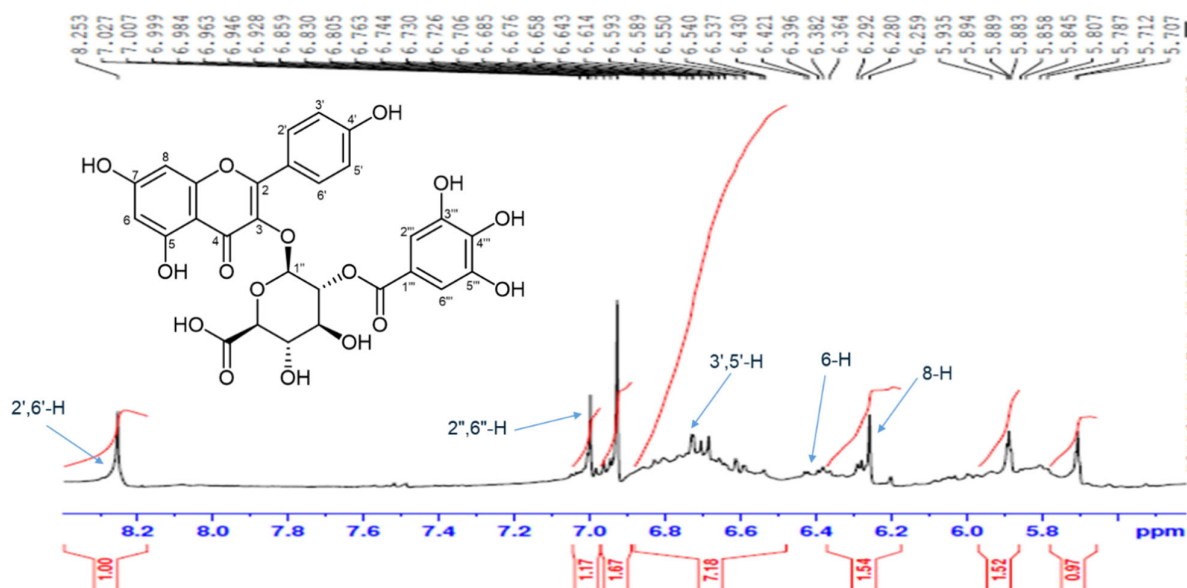

**Figure S38.** Expanded  $^1\text{H}$ -NMR spectrum of kaempferol 3-O-(2''-O-galloyl)-glucuronide (1) [1].

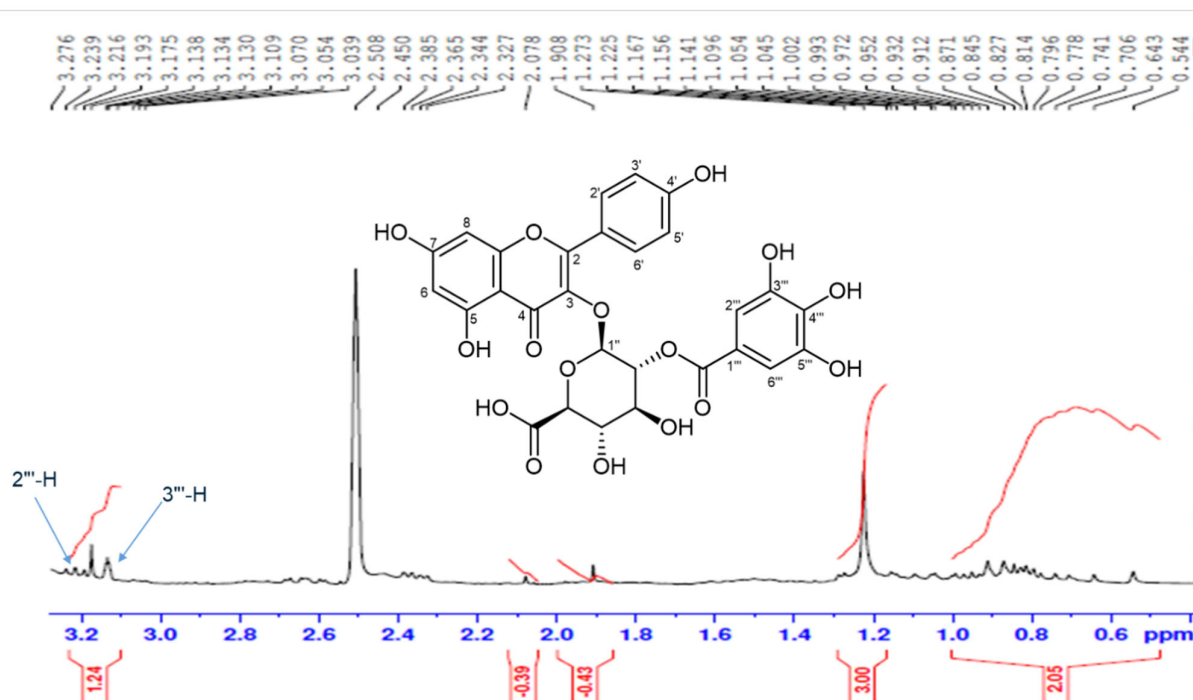

Figure S39. Expanded  $^1\text{H}$ -NMR spectrum of kaempferol 3-O-(2''-O-galloyl)-glucuronide (1) [1].

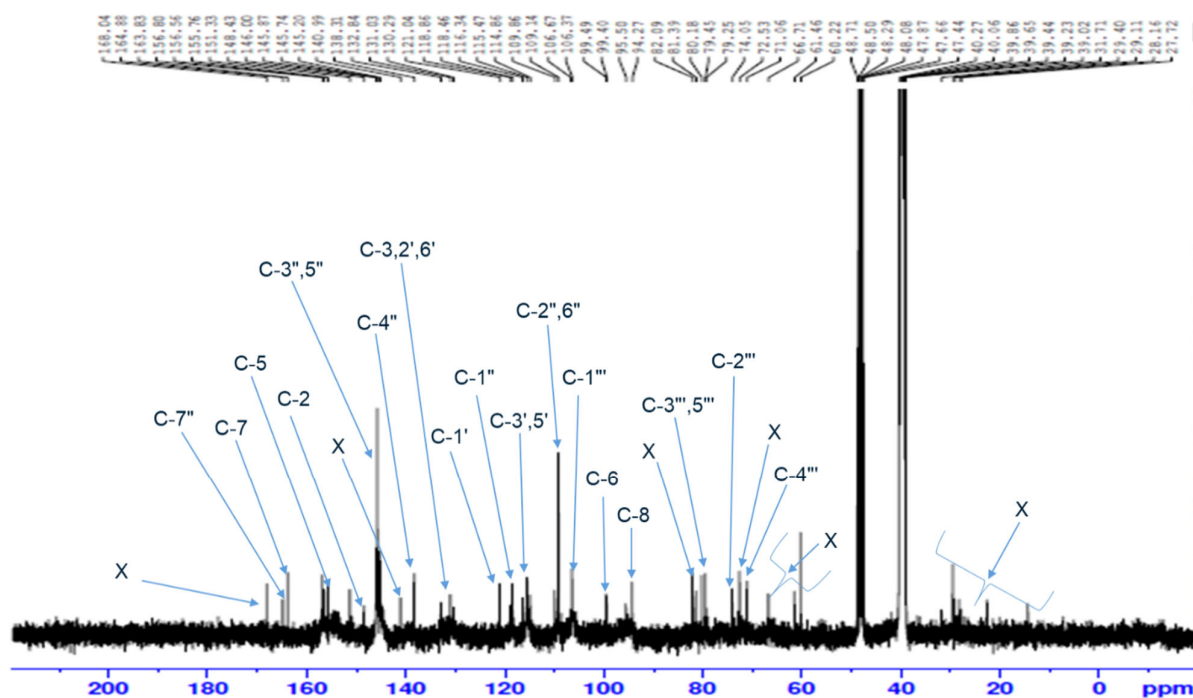

Figure S40.  $^{13}\text{C}$ -NMR spectrum of kaempferol 3-O-(2''-O-galloyl)-glucuronide (1) [1].

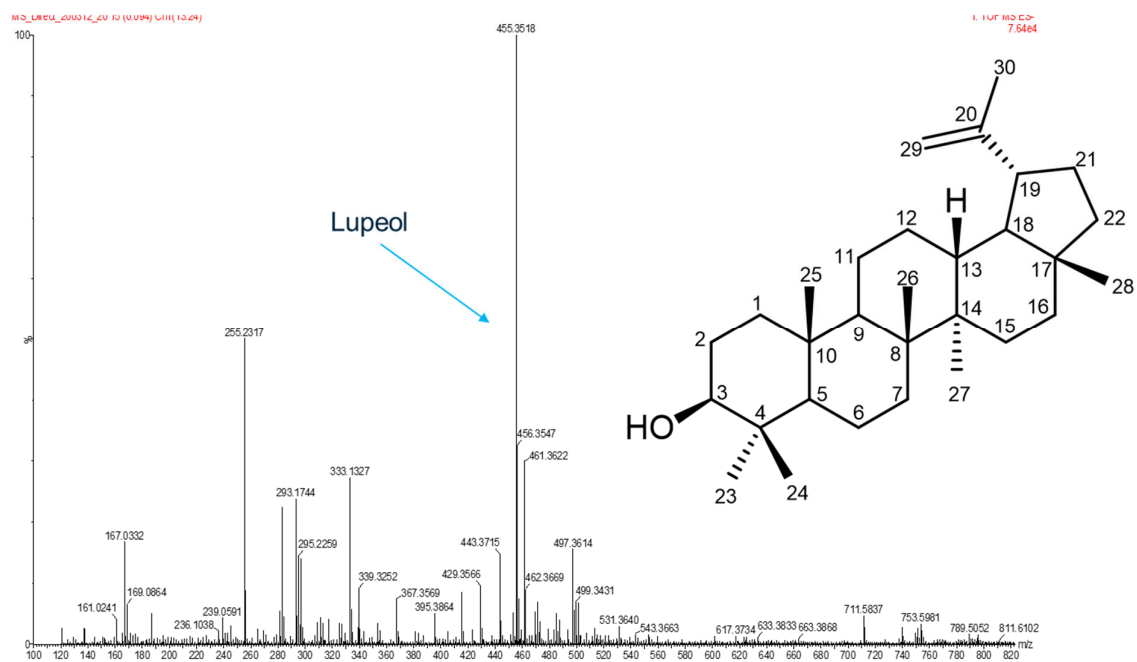

Figure S41. Mass spectrum of lupeol (2) [2].

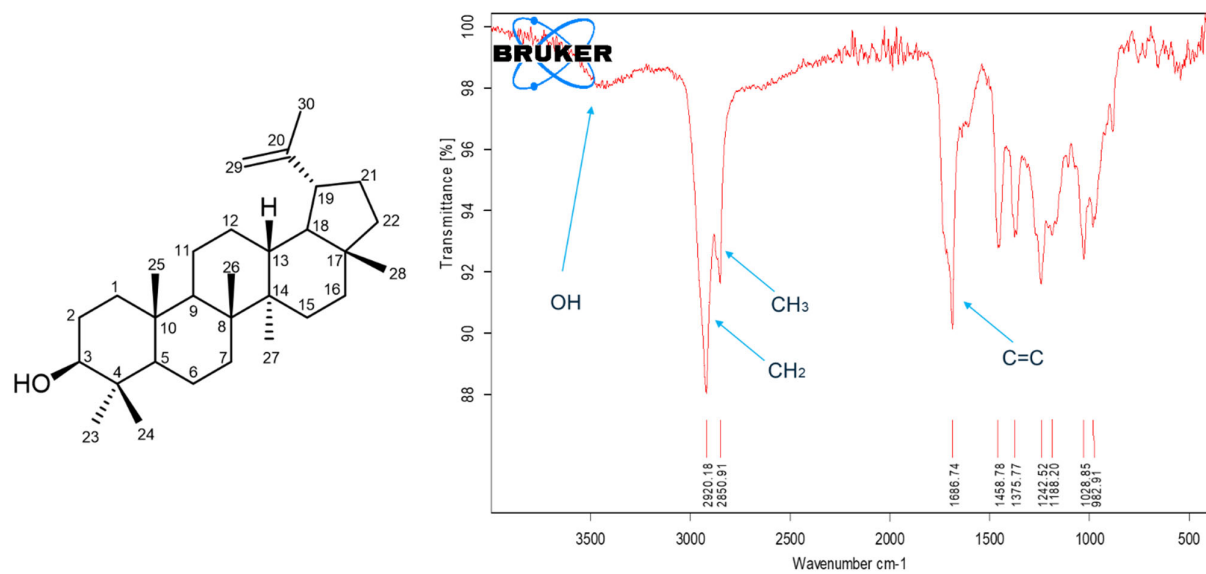

Figure S42. IR spectrum of lupeol (2) [2].



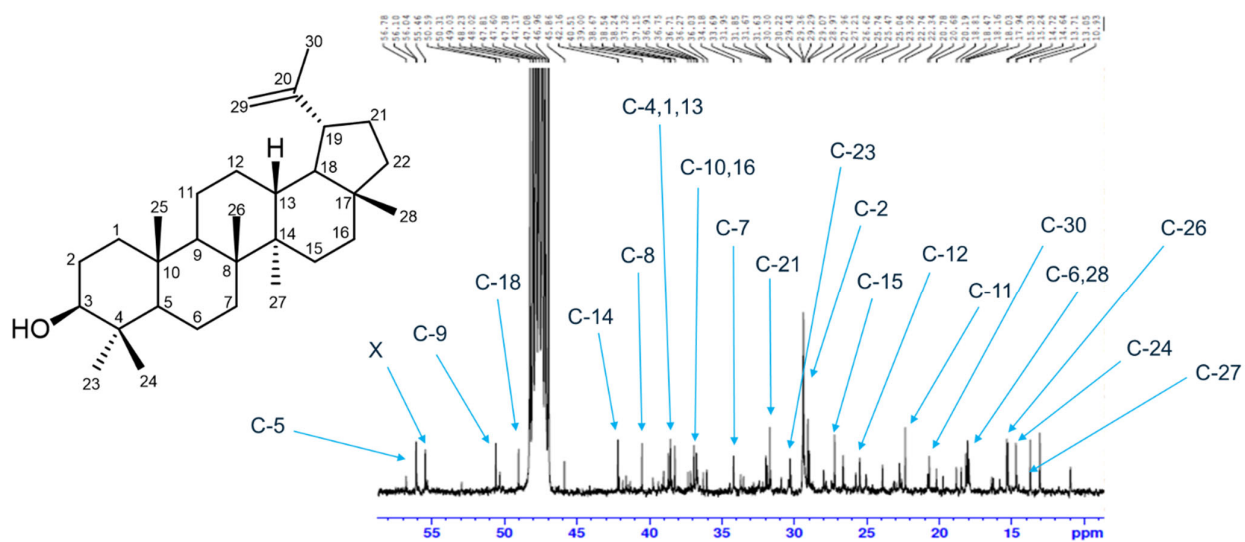

**Figure S45.** Expanded  $^{13}\text{C}$ -NMR spectrum of lupeol (2) [2].

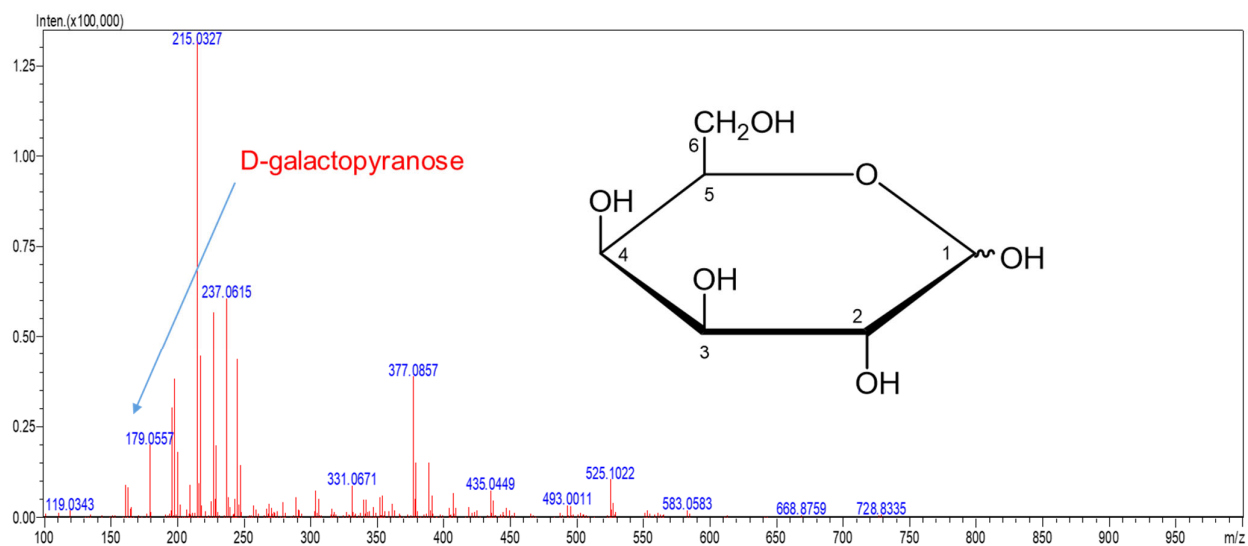

**Figure S46.** Mass spectrum of D-galactopyranose (3) [3].

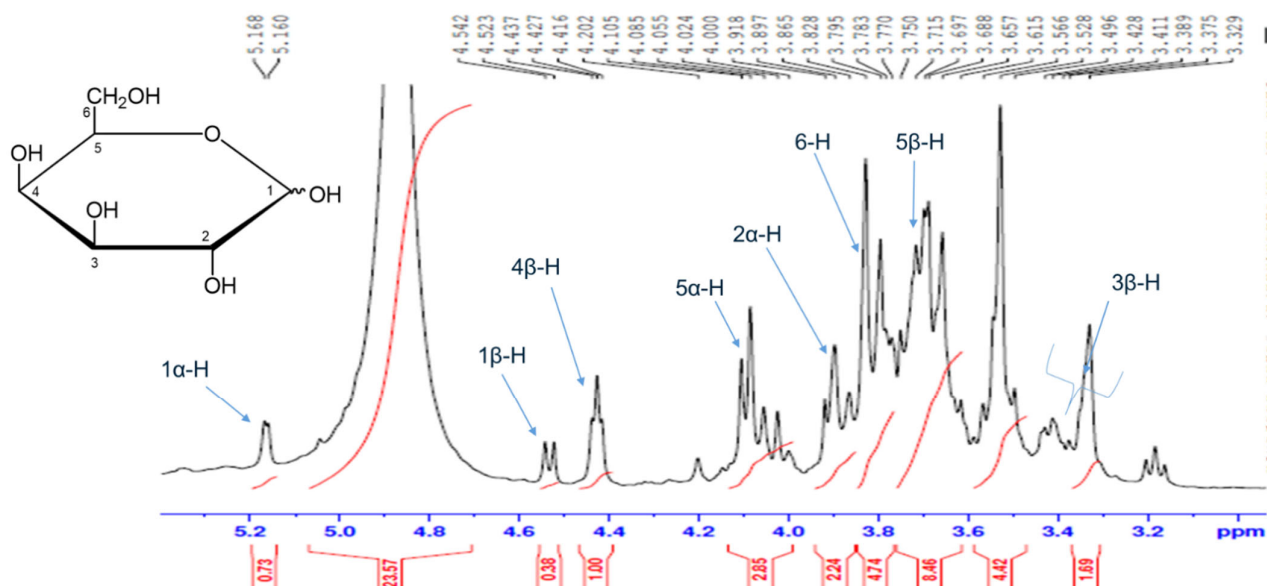

Figure S47. Expanded  $^1\text{H}$ -NMR spectrum of D-galactopyranose (3) [3].

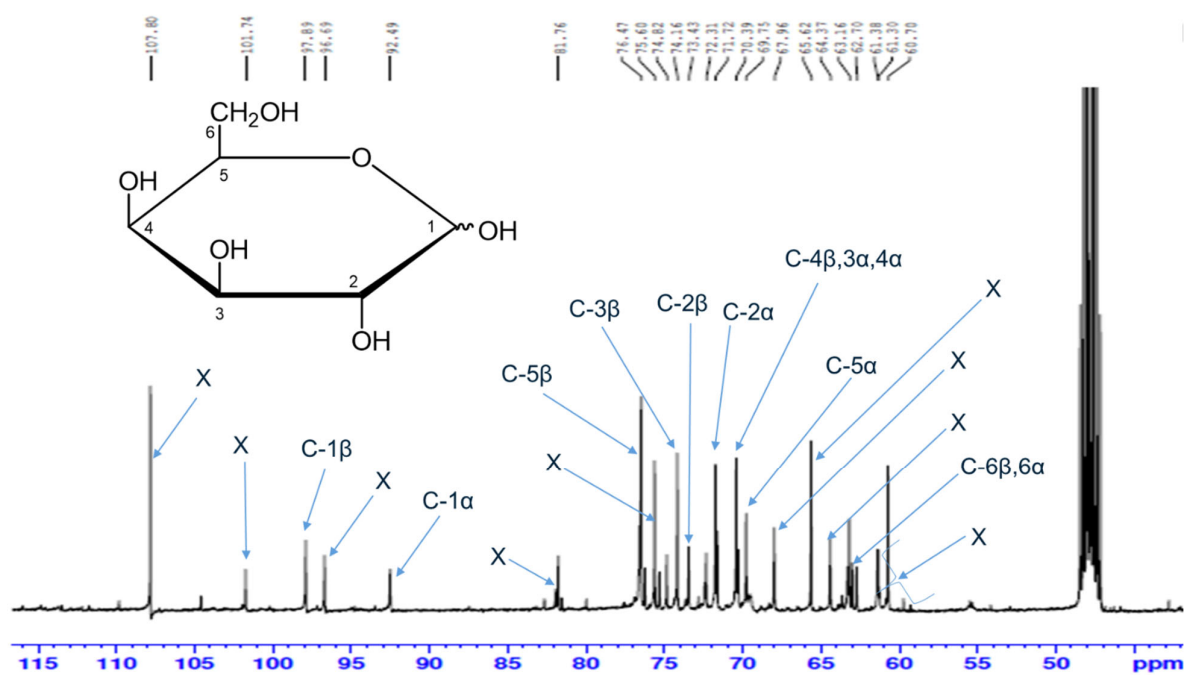

Figure S48.  $^{13}\text{C}$ -NMR spectrum of D-galactopyranose (3) [3].

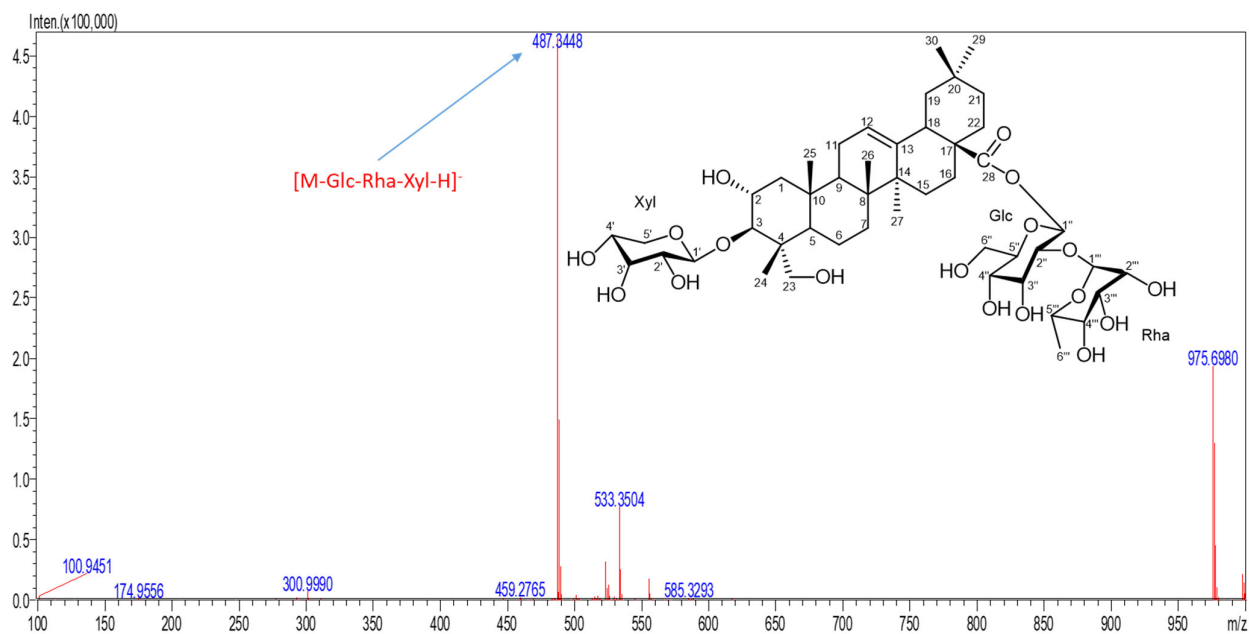

Figure S49. Mass spectrum of bodinioside Q (4) [4].

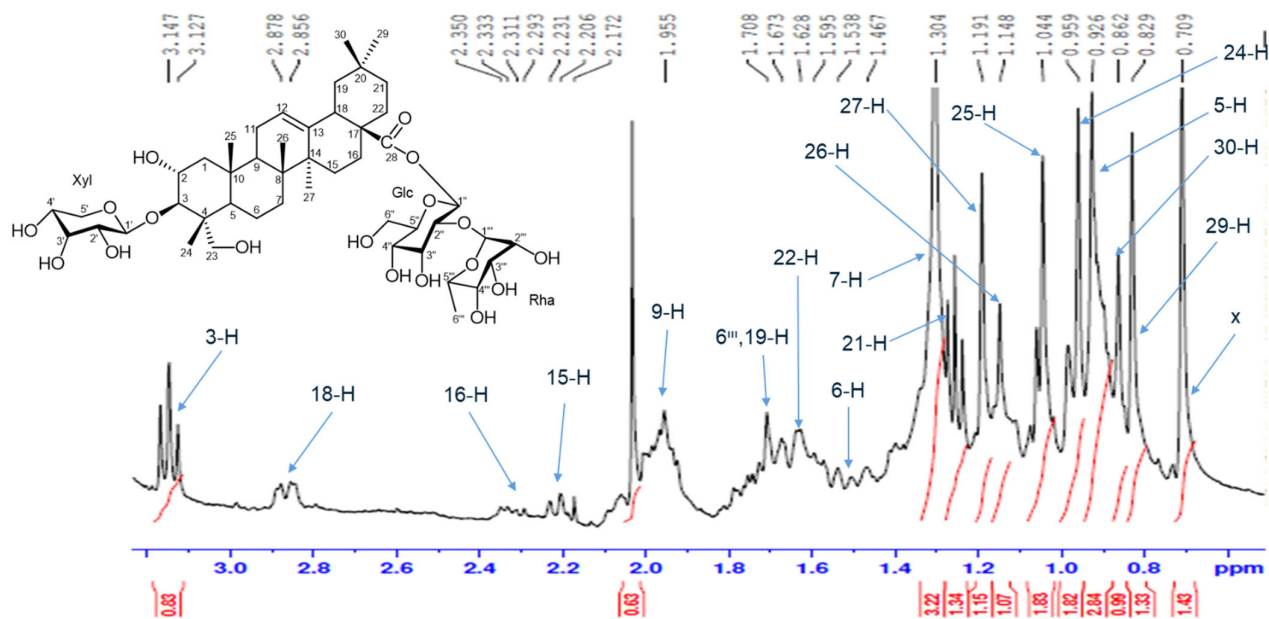

Figure S50. Expanded  $^1H$ -NMR spectrum of bodinioside Q (4) [4].



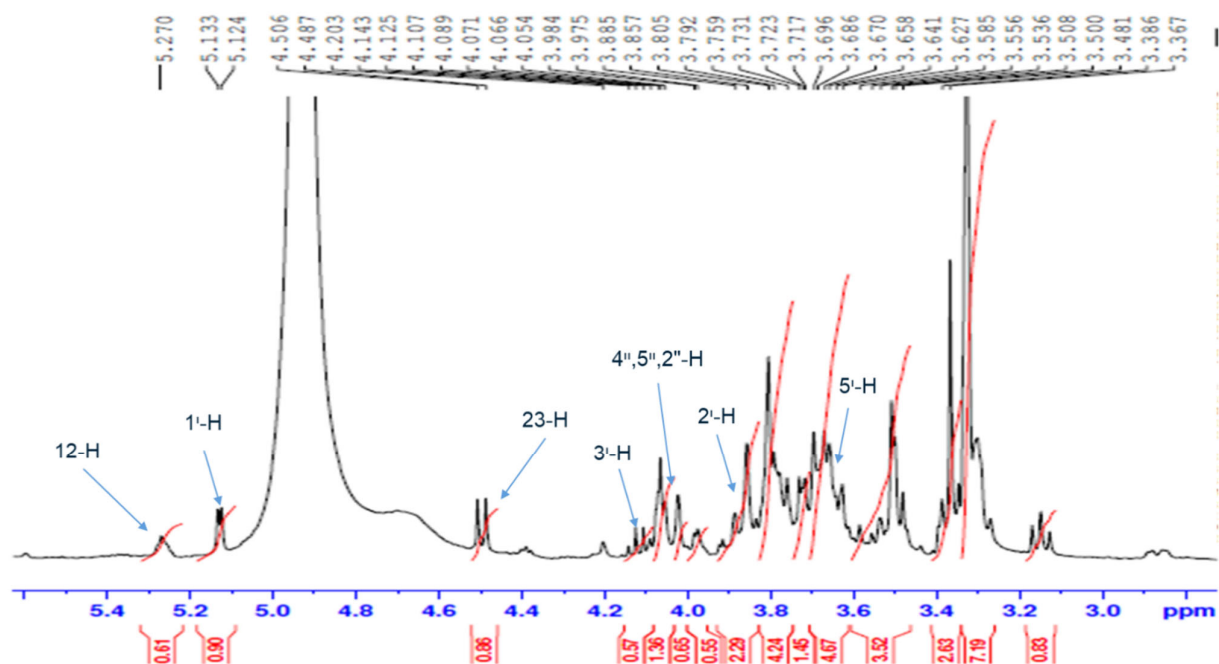

Figure S51. Expanded  $^1\text{H}$ -NMR spectrum of bodinioside Q (4) [4].

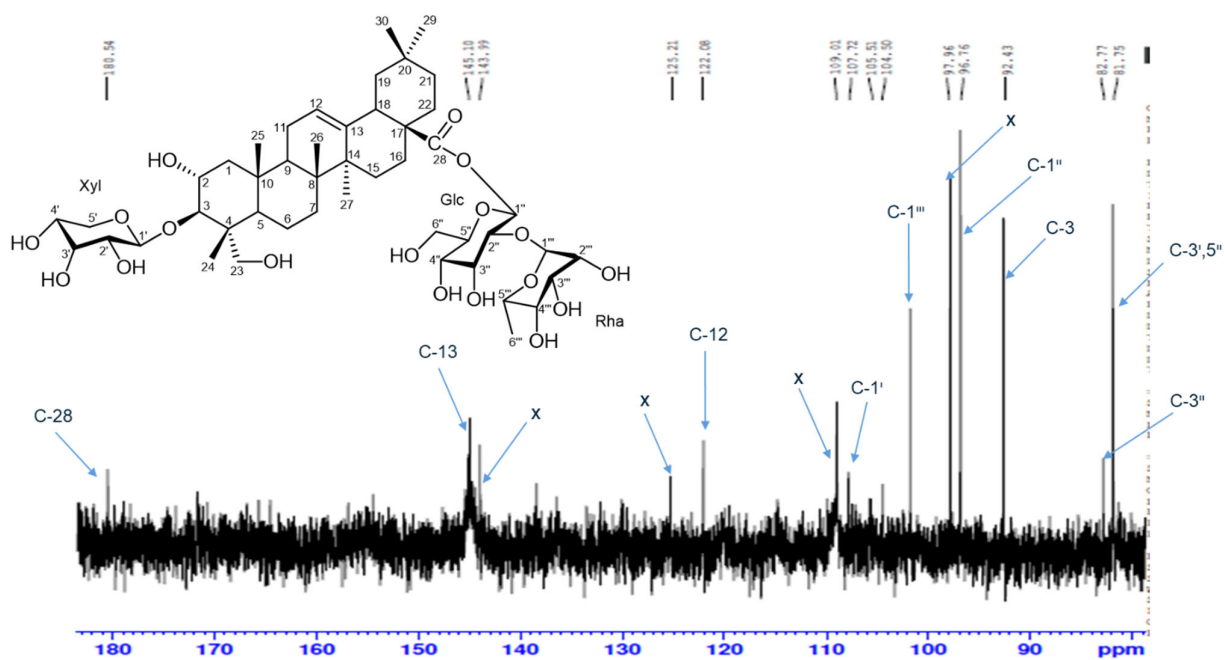

Figure S52.  $^{13}\text{C}$ -NMR spectrum of bodinioside Q (4) [4].



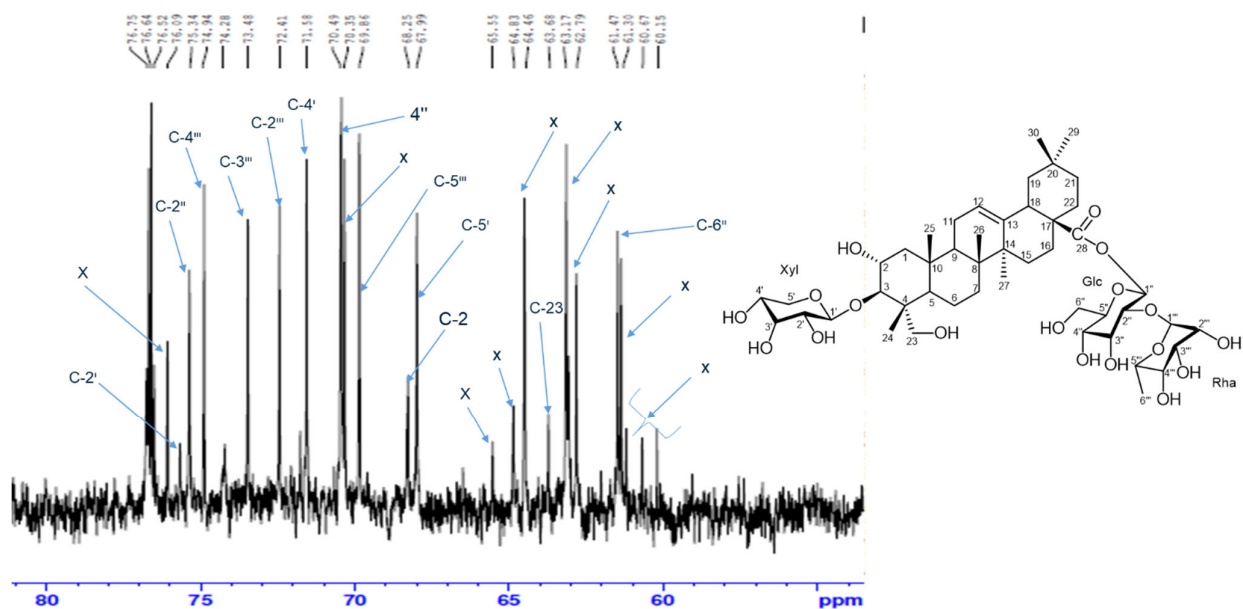

Figure S53.  $^{13}\text{C}$ -NMR spectrum of bodinioside Q (4) [4].

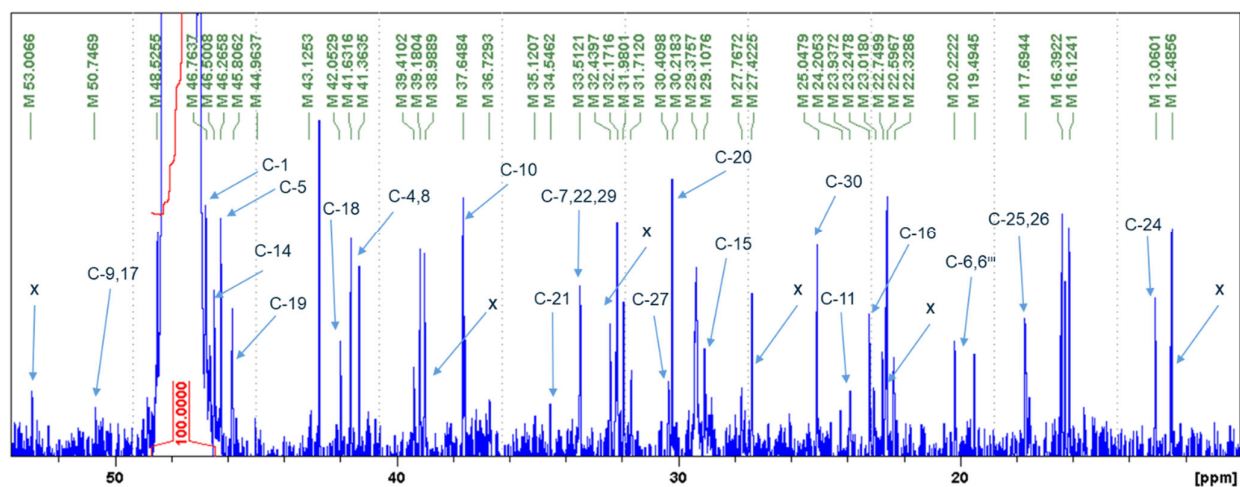

Figure S54.  $^{13}\text{C}$ -NMR spectrum of bodinioside Q (4) [4].

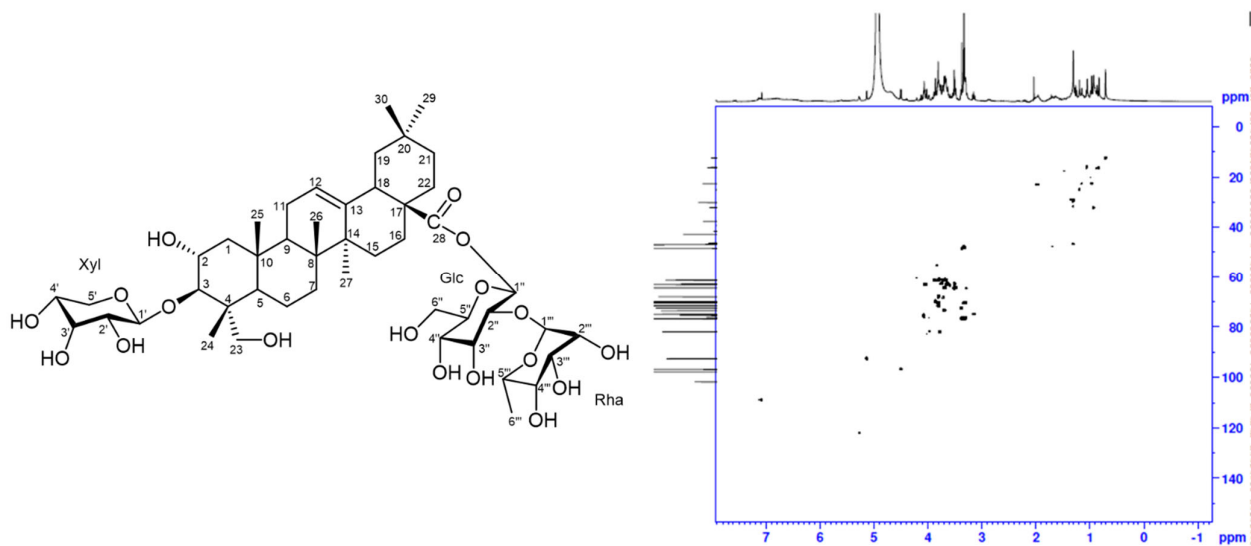

Figure S55. HSQC spectrum of bodinioside Q (4) [4].

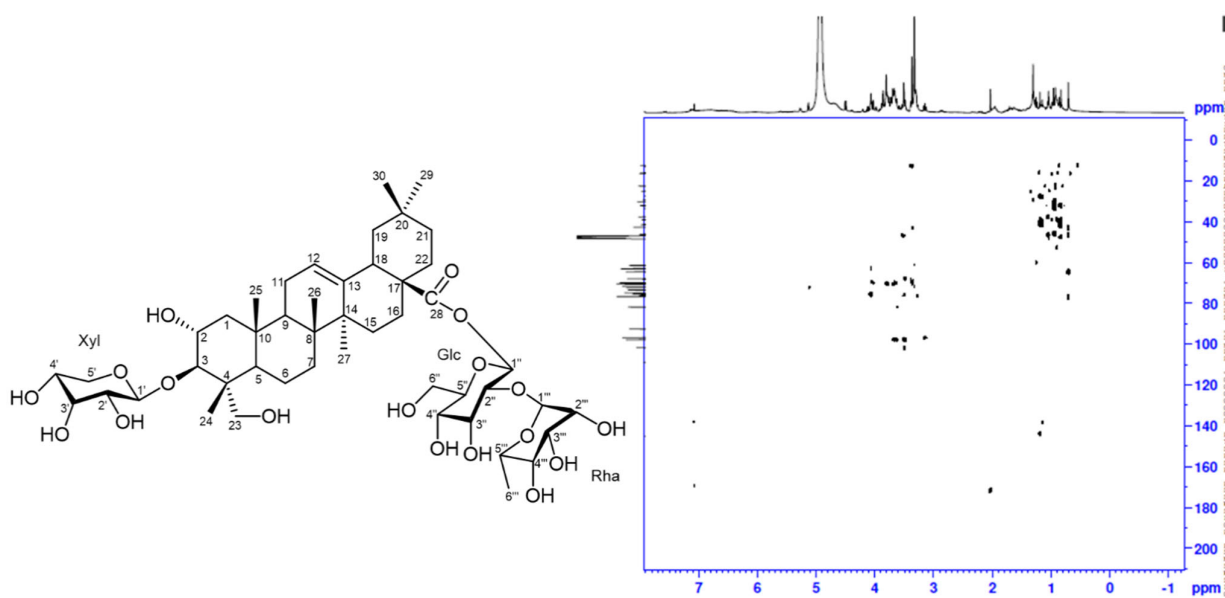

Figure S56. HMBC spectrum of bodinioside Q (4) [4].

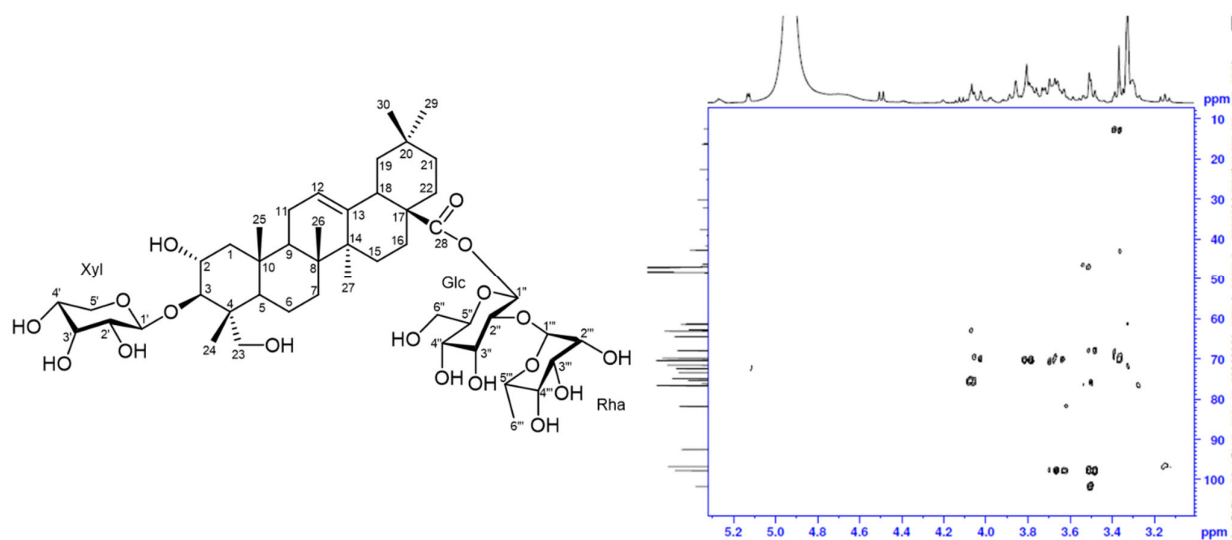

Figure S57. Expanded HMBC spectrum of bodinioside Q (4) [4].

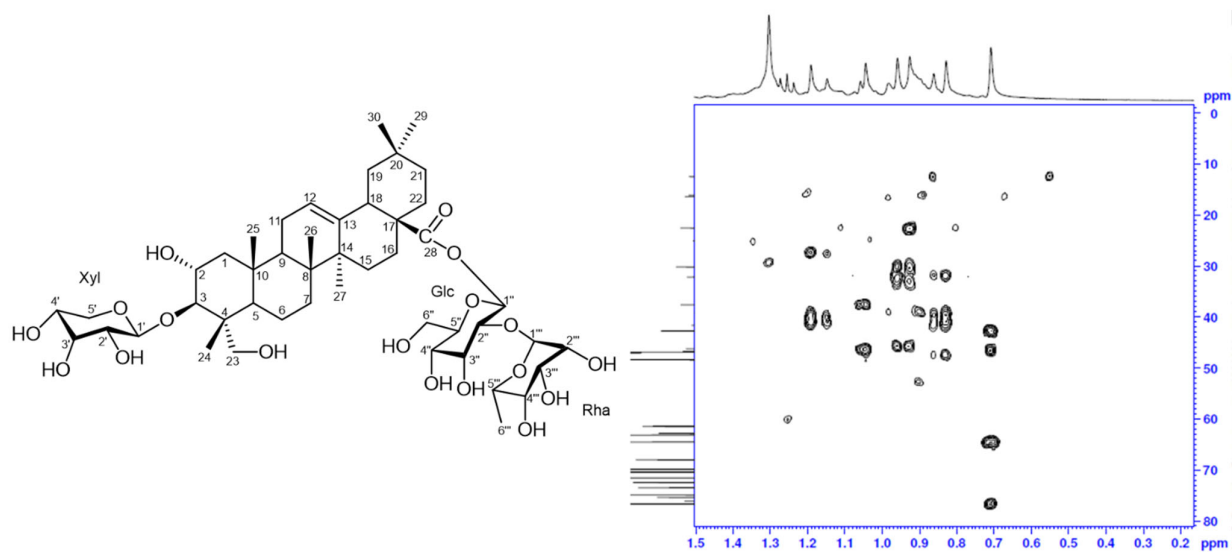

Figure S58. Expanded HMBC spectrum of bodinioside Q (4) [4].

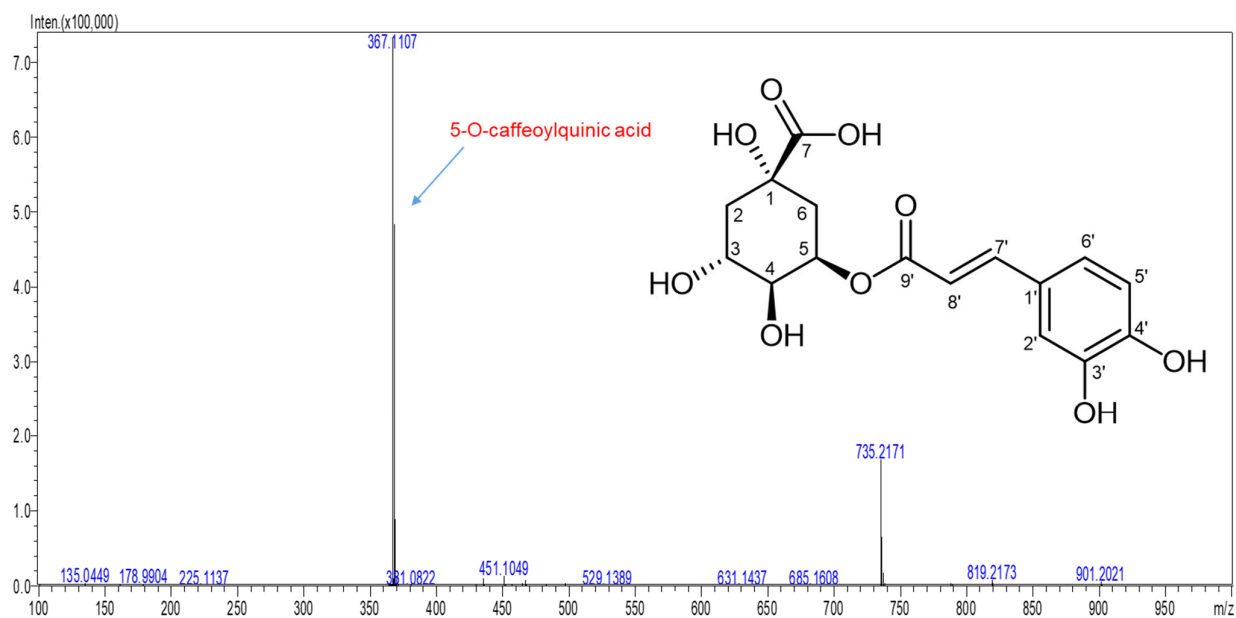

Figure S59. Mass spectrum of 5-O-caffeoylquinic acid (5) [5].

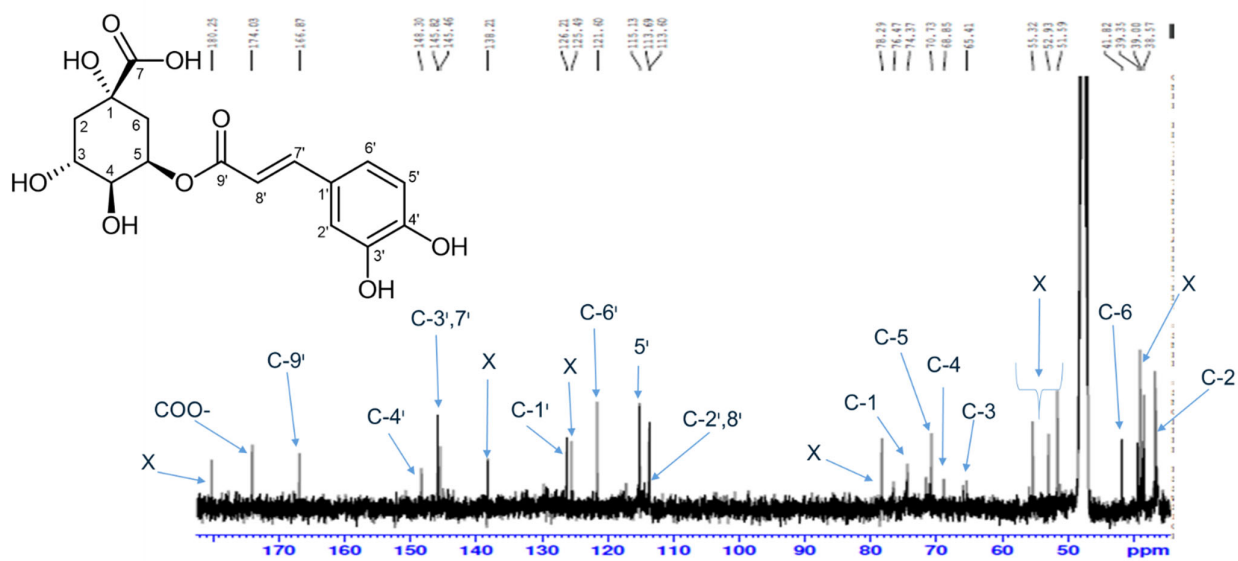

Figure S60. <sup>13</sup>C-NMR spectrum of 5-O-caffeoylquinic acid (5) [5].

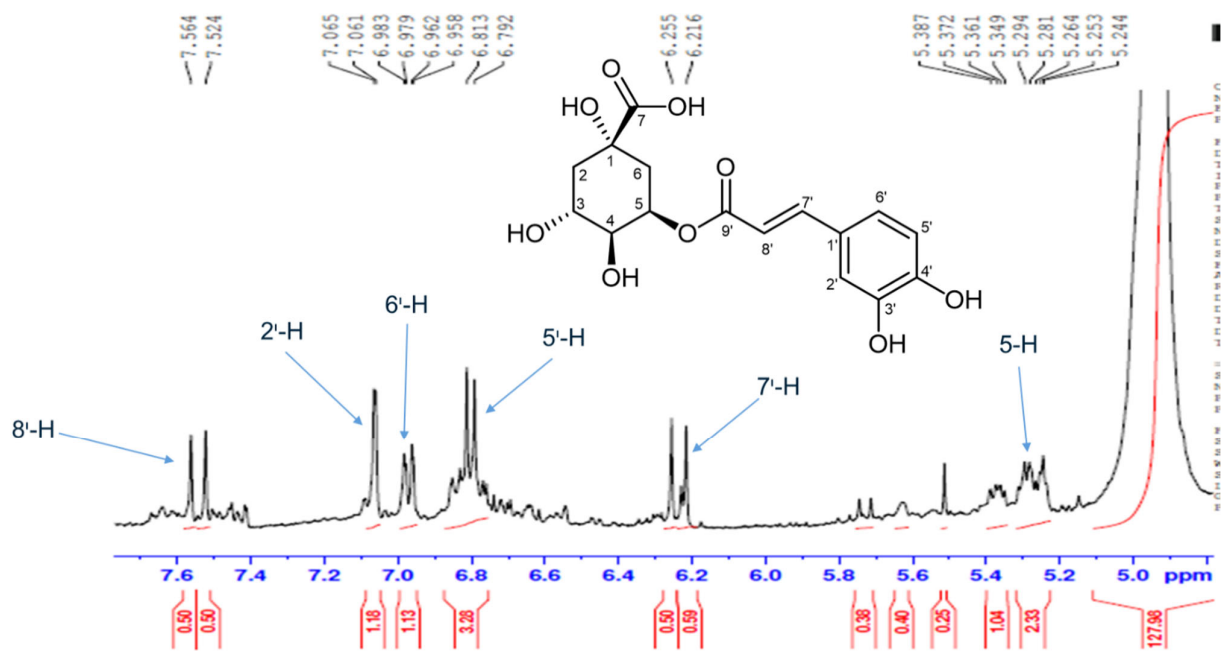

Figure S61. Expanded  $^1\text{H}$ -NMR spectrum of 5-*O*-caffeoylquinic acid (5) [5].

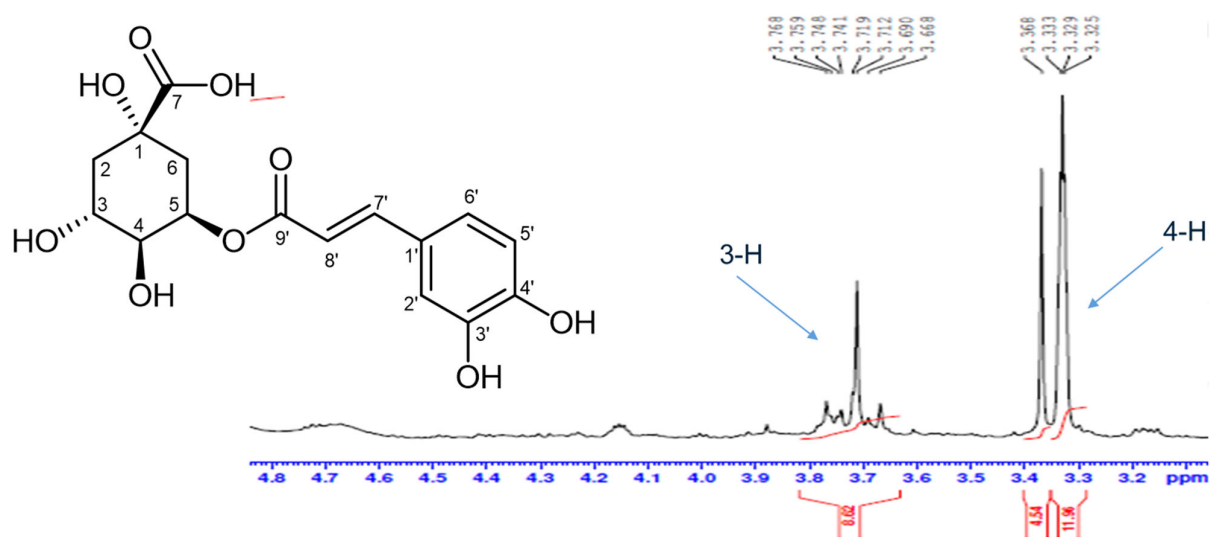

Figure S62. Expanded  $^1\text{H}$ -NMR spectrum of 5-*O*-caffeoylquinic acid (5) [5].

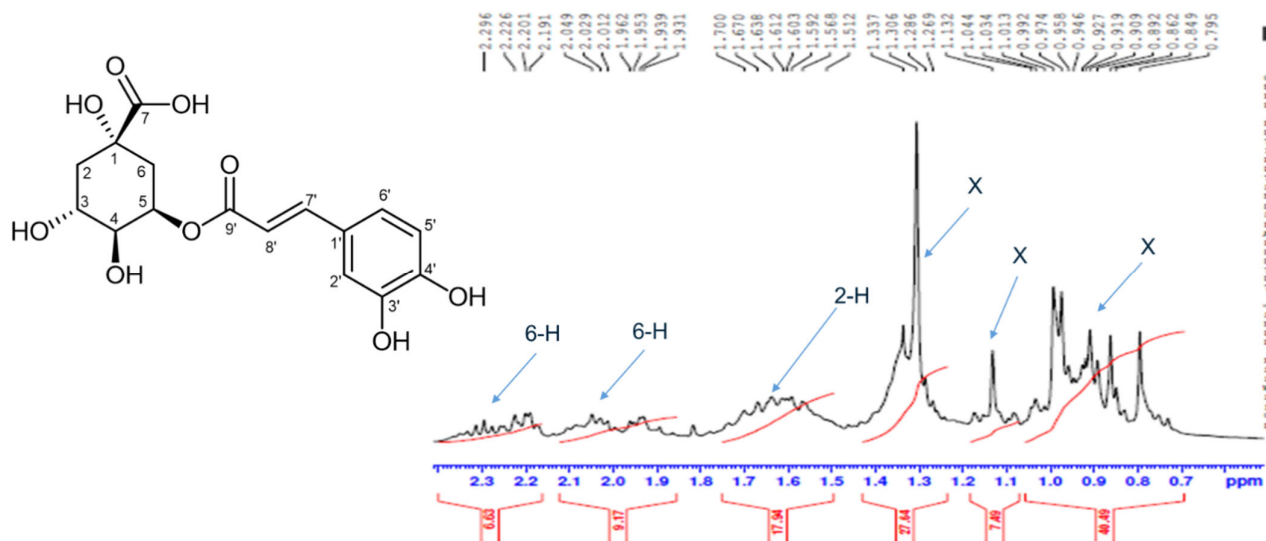

**Figure S63.** Expanded  $^1\text{H}$ -NMR spectrum of 5-*O*-caffeoylquinic acid (**5**) [5].

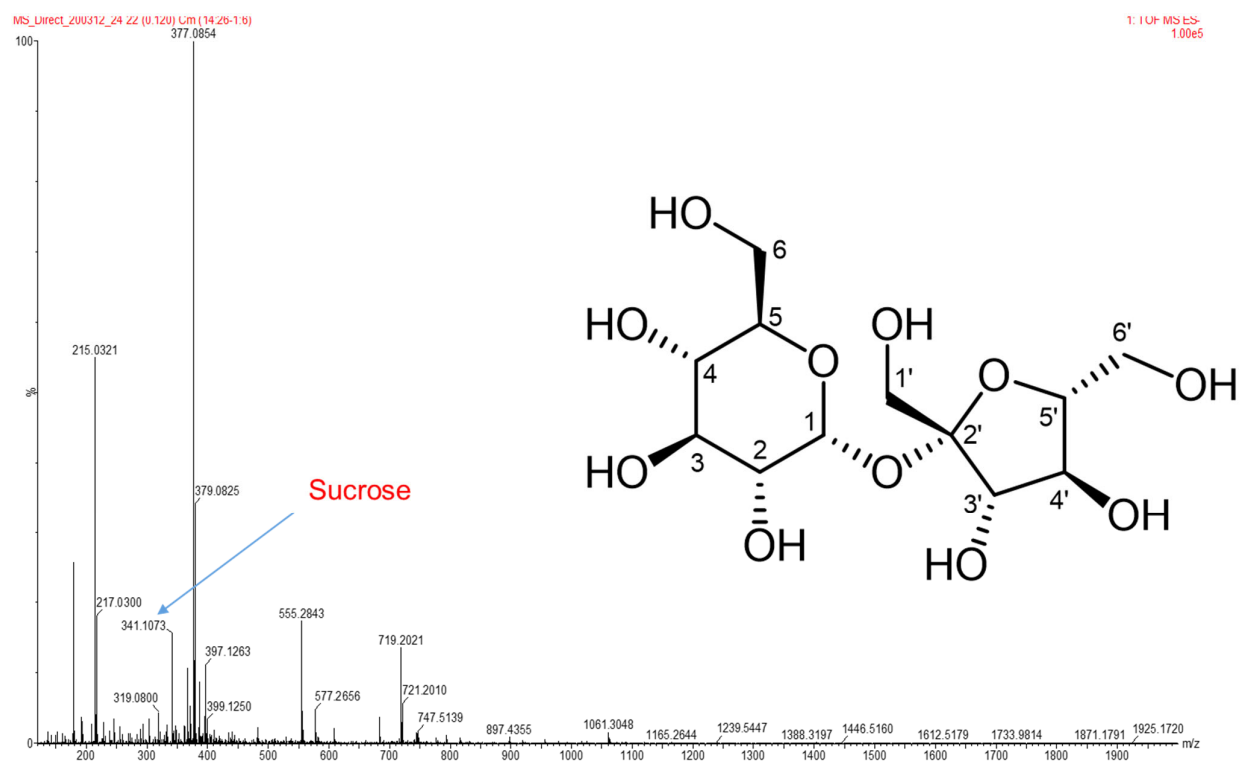

**Figure S64.** MS spectrum of sucrose (**6**) [6].

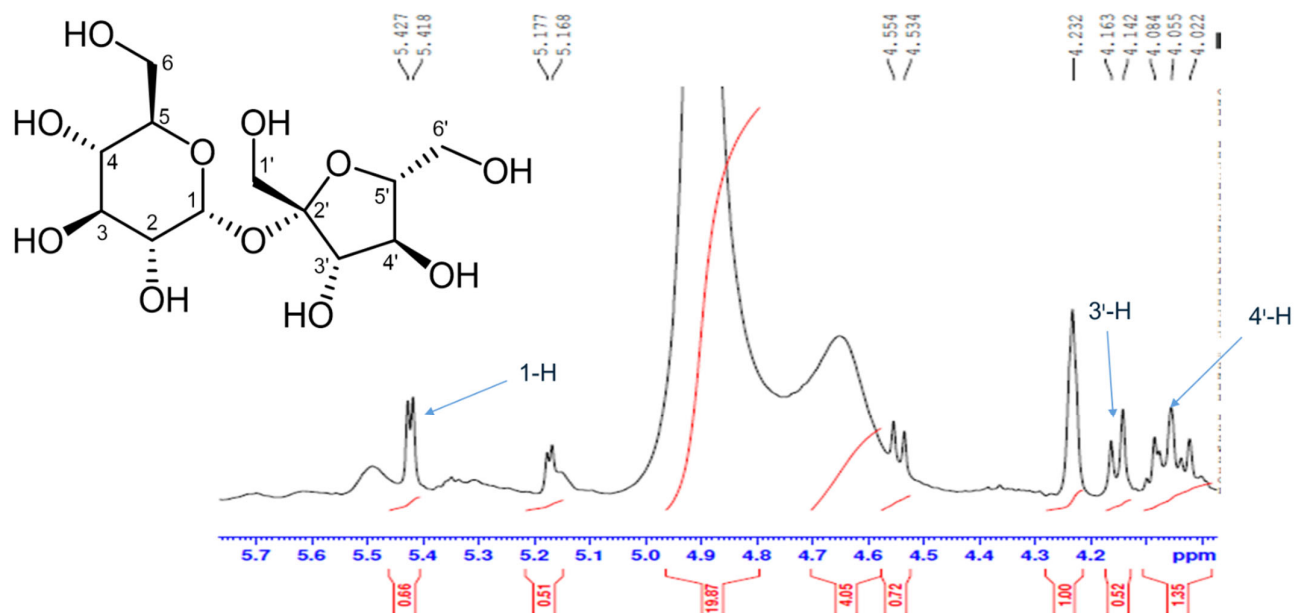

Figure S65. Expanded  $^1\text{H}$ -NMR spectrum of sucrose (6) [6].

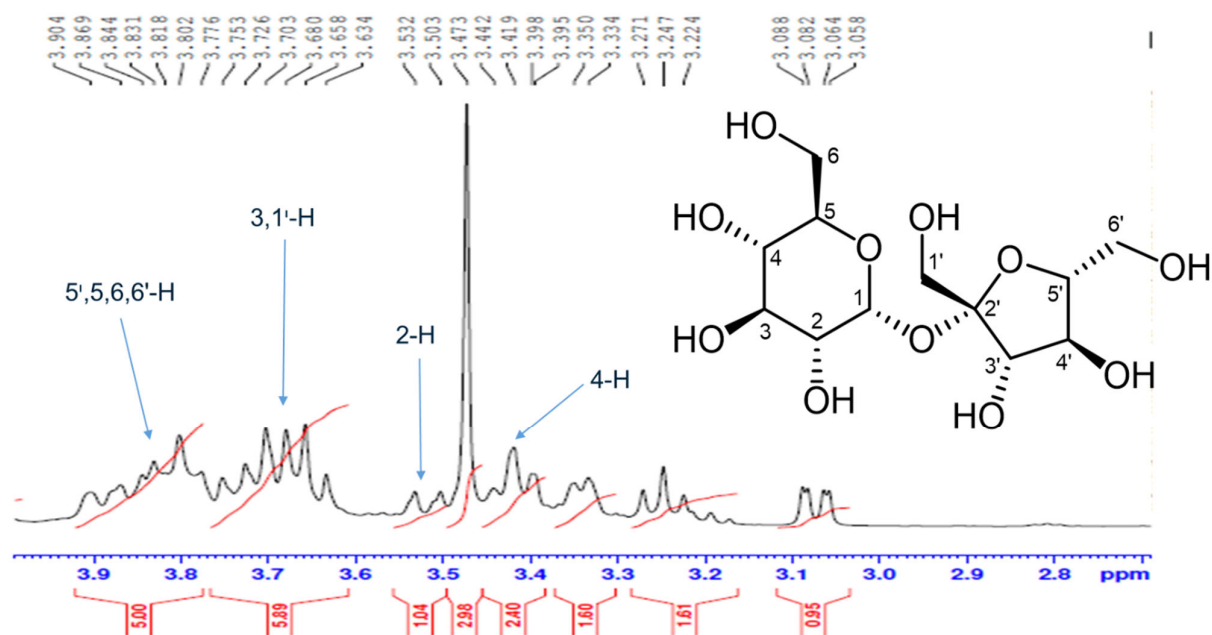

Figure S66. Expanded  $^1\text{H}$ -NMR spectrum of sucrose (6) [6].

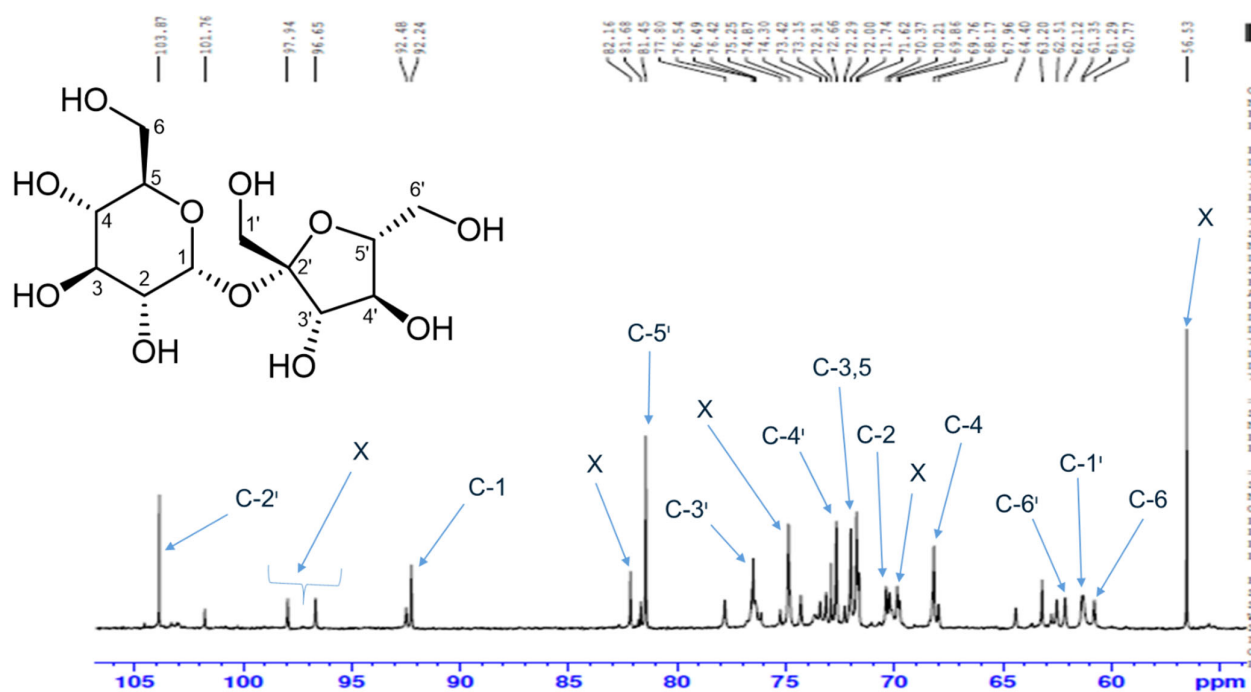

Figure S67.  $^{13}\text{C}$ -NMR spectrum of sucrose (6) [6].

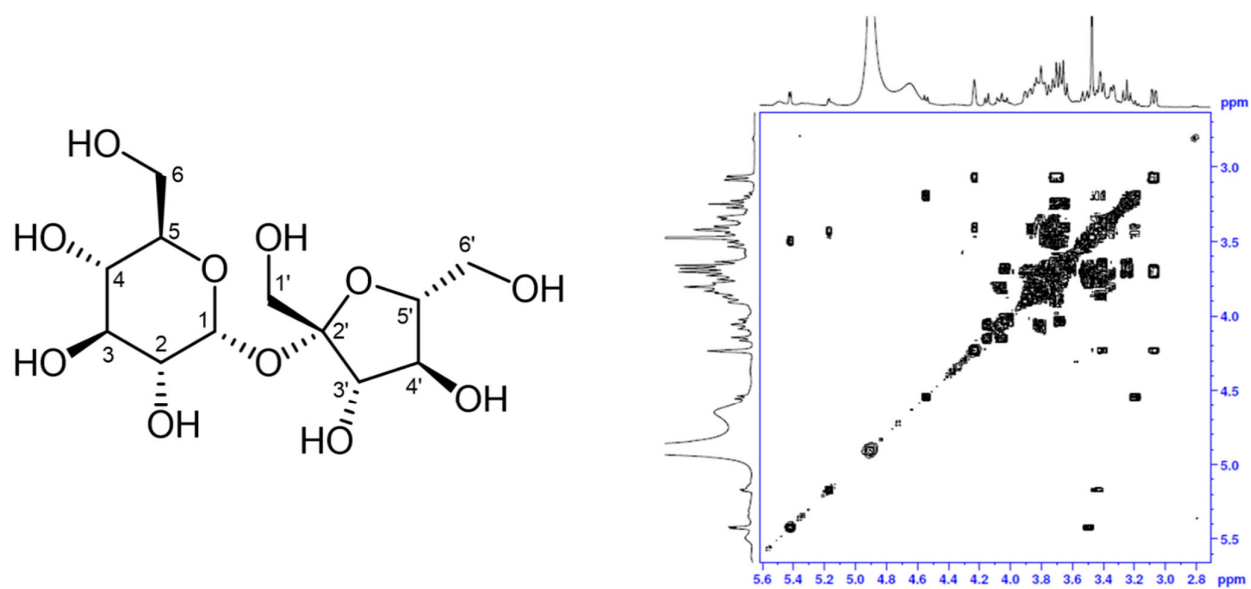

Figure S68. COSY spectrum of sucrose (6) [6].



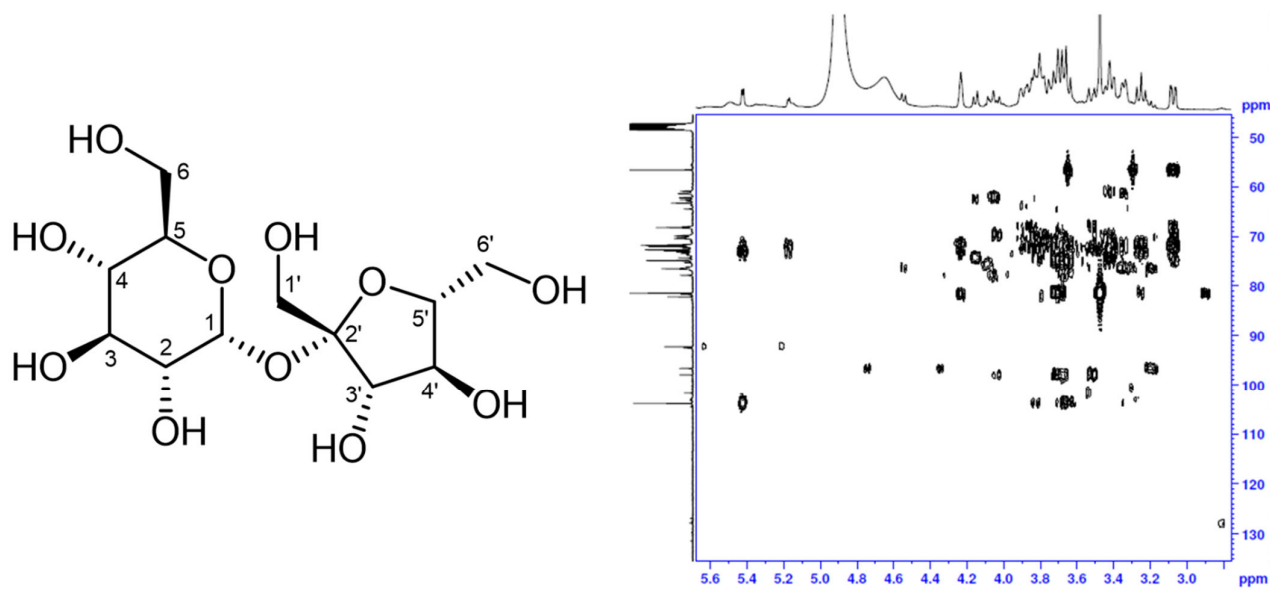

Figure S69. HMBC spectrum of sucrose (6) [6].

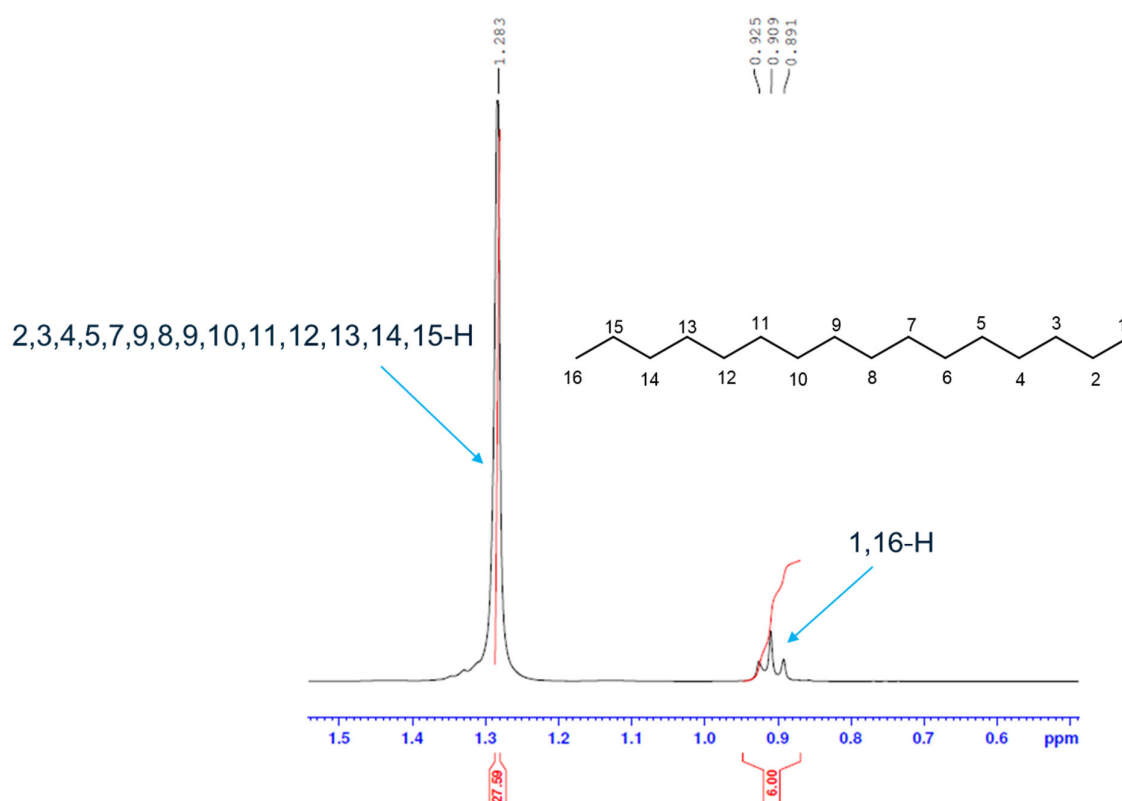

Figure S70. Expanded  $^1\text{H}$ -NMR spectrum of hexadecane (7) [7].

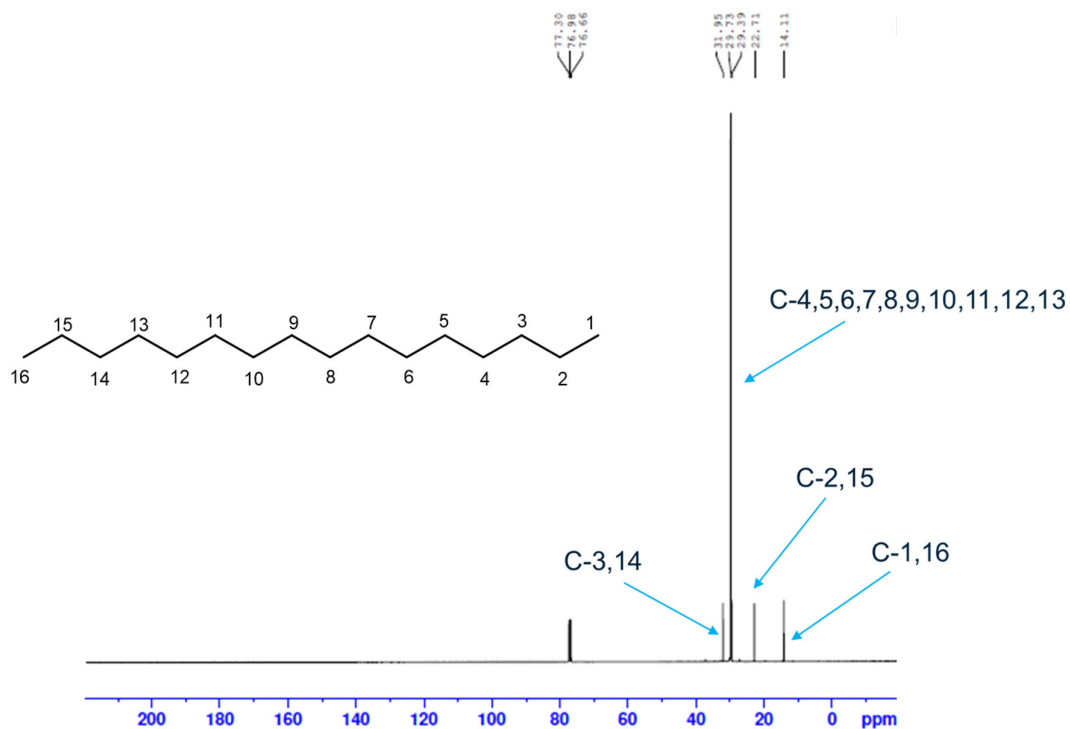

Figure S71.  $^{13}\text{C}$ -NMR spectrum of hexadecane (7) [7].

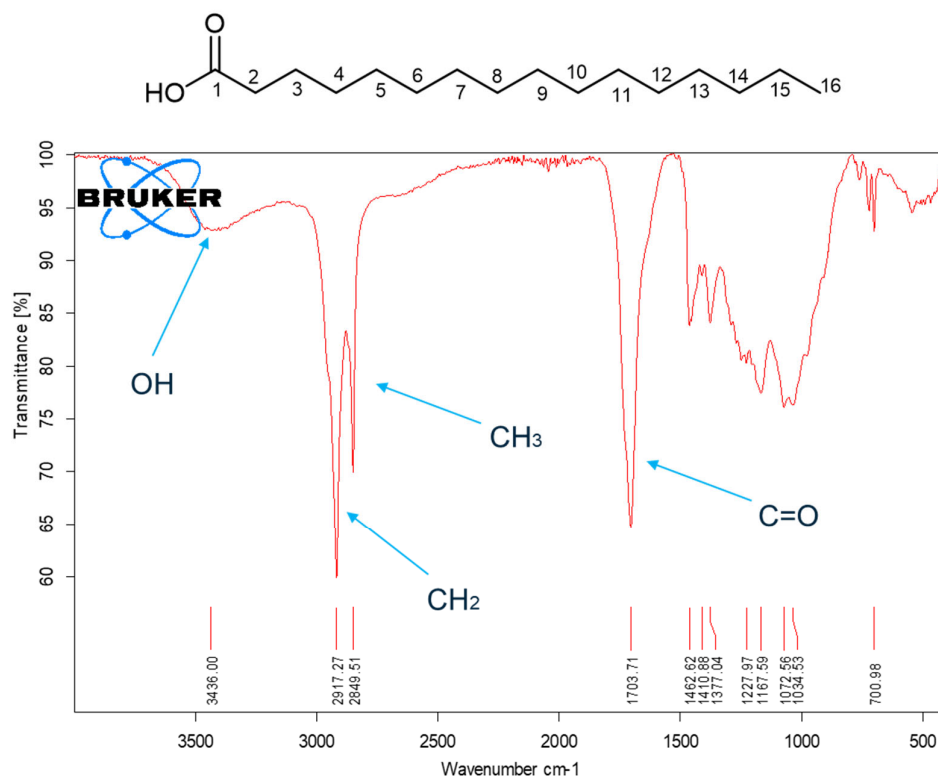

Figure S72. IR spectrum of palmitic acid (8) [8].

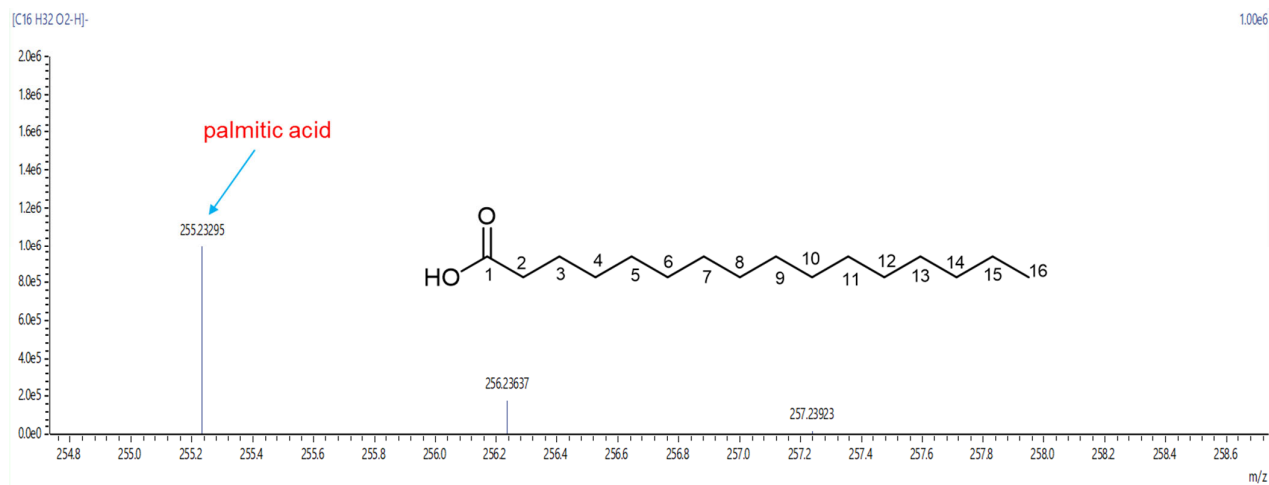

Figure S73. MS spectrum of palmitic acid (8) [8].

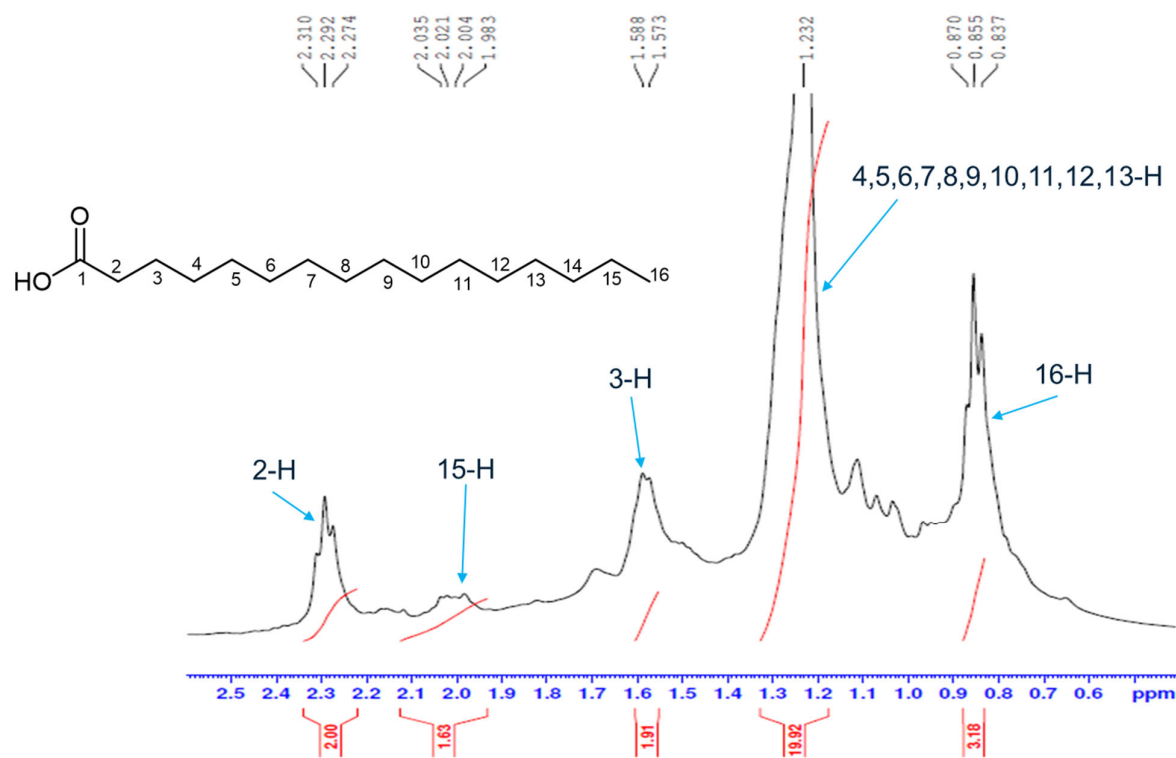

Figure S74. Expanded  $^1\text{H}$ -NMR spectrum of palmitic acid (8) [8].

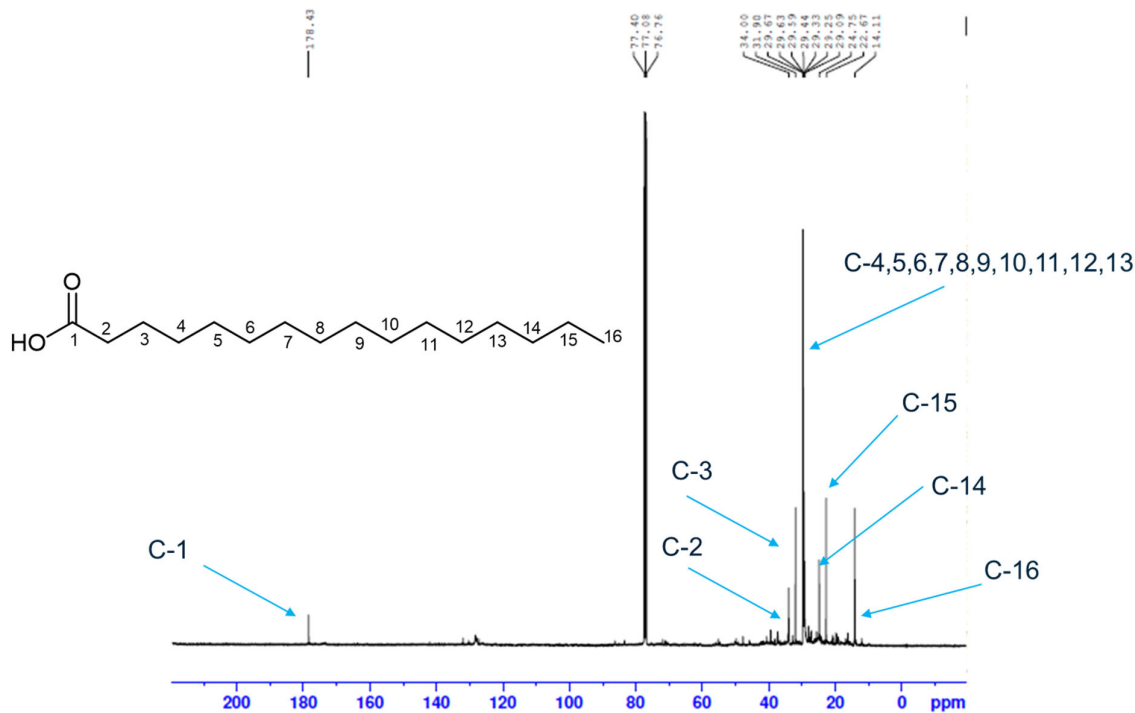

**Figure S75.**  $^{13}\text{C}$ -NMR spectrum of palmitic acid (8) [8].

## References

1. Yoshimura, M.; Ito, H.; Miyashita, K.; Hatano, T.; Taniguchi, S.; Amakura, Y.; Yoshida, T. Flavonol glucuronides and C-glucosidic ellagitannins from *Melaleuca squarrosa*. *Phytochemistry*, **2008**, 69, 3062-3069.
2. Mouffok, S.; Haba, H.; Lavaud, C.; Long, C.; Benkhaled, M. Chemical constituents of Chemical constituents of *Centaurea omphalotricha* Coss. & Durieu ex Batt. & Trab. *Records of Natural Products*, **2012**, 6, 292-5.
3. Ogawa, K.; Yamamura, M.; Maruyama, I. Isolation and identification of 3-O-methyl-d-galactose as a constituent of neutral polysaccharide of *Chlorella vulgaris*. *Bioscience, Biotechnology, and Biochemistry*, **1994**, 58, 942-944.
4. Yang, L.; Zhang, L.; Du, J.; Shao, L.; Yu, F.; Li, R.; Zhong, J. Two new oleanane triterpenoid saponins from *Elsholtzia bodinieri*. *Natural Product Research*, **2020**, 1-9.
5. Suarez-Quiroz, M.L.; Campos, A.A.; Alfaro, G.V.; González-Ríos, O.; Villeneuve, P.; Figueroa-Espinoza, M.C. Isolation of green coffee chlorogenic acids using activated carbon. *Journal of Food Composition and Analysis*, **2014**, 33, 55-58.
6. Ben Youssef, S.; Fakhfakh, J.; Tchoumtchoua, J.; Halabalaki, M.; Allouche, N. Efficient purification and complete NMR characterization of galactinol, sucrose, raffinose, and stachyose isolated from *Pinus halepensis* (Aleppo pine) seeds using acetylation procedure. *Journal of Carbohydrate Chemistry*, **2016**, 35, 224-237.
7. Li, X.Y.; Shang, R.; Fu, M.C.; Fu, Y. Conversion of biomass-derived fatty acids and derivatives into hydrocarbons using a metal-free hydrodeoxygenation process. *Green Chemistry*, **2015**, 17, 2790-2793.
8. Bulama, J.; Dangoggo, S.; Halilu, M.; Tsafe, A.I.; Hassan, S.W. Isolation and characterization of palmitic acid from ethyl acetate extract of root bark of *Terminalia glaucescens*. *Chemistry and Materials Research*, **2014**, 6, 140-3.
